# Supplementary material for: Hydrogen bonding of 3- and 5-methyl-6-aminouracil with natural DNA bases
Source: Royal Society of Chemistry journal article supplement (doi:10.1039/b803593h), 2008-01-01
Supplement: b803593h.pdf [file b803593h.pdf]

*Supporting Information for*  
**Hydrogen bonding of 3- and 5-methyl-6-aminouracils with natural DNA bases.**

Gábor Paragi,<sup>a</sup> Emília Szájli,<sup>b</sup> Ferenc Bogár,<sup>a</sup> Lajos Kovács,<sup>c</sup> Célia Fonseca Guerra,<sup>d</sup> and F. Matthias Bickelhaupt<sup>d\*</sup>

<sup>a</sup> *Supramolecular and Nanostructured Materials Research Group of the Hungarian Academy of Science at the University of Szeged, Dóm tér 8, H-6720, Szeged, Hungary. Fax: 36 62 545971; E-mail: paragi@sol.cc.u-szeged.hu*

<sup>b</sup> *Proteomics Research Group at the Biological Research Center of the Hungarian Academy of Science, Temesvári krt. 62, H-6726 Szeged, Hungary*

<sup>c</sup> *University of Szeged, Department of Medical Chemistry, Dóm tér 8., H-6720, Szeged, Hungary*

<sup>d</sup> *Theoretische Chemie, Scheikundig Laboratorium der Vrije Universiteit, De Boelelaan 1083, NL-1081 HV Amsterdam, The Netherlands*

*Fax: +31 - 20 - 59 87617, Email: FM.Bickelhaupt@few.vu.nl*

## Contents

- **Figure S1.** Total bonding energy of 3-methyl-6-aminouracil and 5-methyl-6-aminouracil with natural nucleobases. S2
- **Table S1.** Cartesian coordinates of all calculated duplex systems. S3

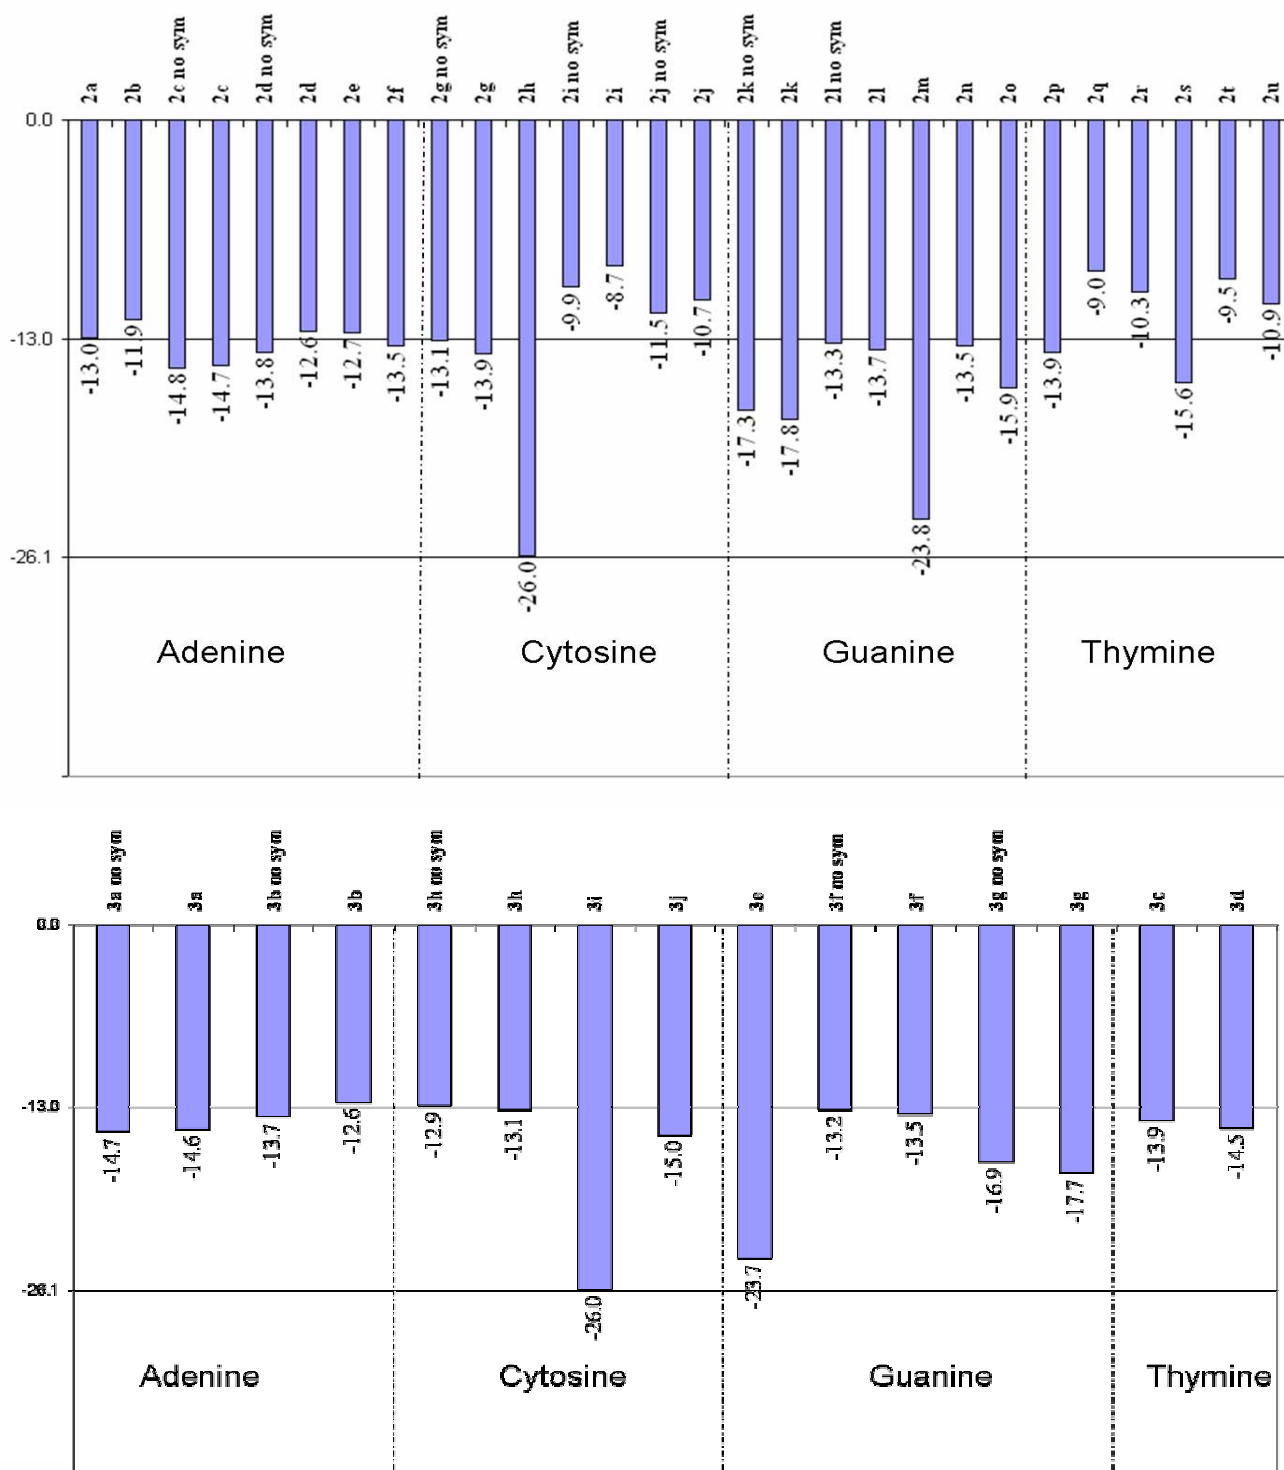

**Figure S1** Total bonding energy (in kcal/mol) of 3-methyl-6-aminouracil (top) and 5-methyl-6-aminouracil (bottom) with natural nucleobases. The two horizontal lines show the interaction energy of the natural base-pairs (-13.0 kcal/mol for A-T and -26.1 kcal/mol for G-C)<sup>a</sup>

<sup>a</sup> The A-T and G-C interaction energies are taken from reference 3b

**Table S1.** Cartesian coordinates of all calculated duplex systems. The definitions of different bonding arrangements can be found in Figure 2 and Figure 3 in the article.

*Adenine — 3-methyl-6-aminouracil*

| <i>2a: C<sub>s</sub> symmetry</i> |           |           |           | <i>2b: C<sub>s</sub> symmetry</i> |           |           |           |
|-----------------------------------|-----------|-----------|-----------|-----------------------------------|-----------|-----------|-----------|
| N                                 | 2.330677  | -0.445582 | 0.000000  | N                                 | 5.169079  | 0.013384  | 0.000000  |
| N                                 | 0.332637  | -1.797396 | 0.000000  | N                                 | 7.055155  | -1.325781 | 0.000000  |
| N                                 | -1.687564 | -0.419879 | 0.000000  | N                                 | 9.228459  | -0.486264 | 0.000000  |
| N                                 | -0.741185 | 1.636588  | 0.000000  | C                                 | 5.666455  | -1.249557 | 0.000000  |
| N                                 | 2.337940  | 1.883779  | 0.000000  | C                                 | 7.886741  | -0.219810 | 0.000000  |
| C                                 | 1.654589  | -1.611460 | 0.000000  | C                                 | 7.363937  | 1.050441  | 0.000000  |
| C                                 | -0.321988 | -0.623532 | 0.000000  | C                                 | 5.923558  | 1.210569  | 0.000000  |
| C                                 | 0.238648  | 0.660631  | 0.000000  | C                                 | 8.240485  | 2.271923  | 0.000000  |
| C                                 | 1.651554  | 0.730245  | 0.000000  | O                                 | 5.327340  | 2.291315  | 0.000000  |
| C                                 | -1.867245 | 0.950673  | 0.000000  | O                                 | 4.987274  | -2.286650 | 0.000000  |
| C                                 | -2.700266 | -1.464227 | 0.000000  | H                                 | 4.109874  | 0.102804  | 0.000000  |
| H                                 | 2.281325  | -2.503909 | 0.000000  | H                                 | 7.425826  | -2.269929 | 0.000000  |
| H                                 | -2.861926 | 1.385157  | 0.000000  | H                                 | 8.886350  | 2.325184  | -0.891675 |
| H                                 | 3.373140  | 1.880464  | 0.000000  | H                                 | 8.886350  | 2.325184  | 0.891675  |
| H                                 | 1.820066  | 2.751636  | 0.000000  | H                                 | 7.597804  | 3.159127  | 0.000000  |
| H                                 | -2.178136 | -2.426134 | 0.000000  | H                                 | 9.591786  | -1.427376 | 0.000000  |
| H                                 | -3.329989 | -1.395228 | -0.895675 | H                                 | 9.885425  | 0.278840  | 0.000000  |
| H                                 | -3.329989 | -1.395228 | 0.895675  | N                                 | 2.367490  | 0.180659  | 0.000000  |
| N                                 | 5.129780  | -0.517461 | 0.000000  | N                                 | 0.532437  | 1.745638  | 0.000000  |
| N                                 | 7.094551  | -1.748377 | 0.000000  | N                                 | -1.628058 | 0.602530  | 0.000000  |
| N                                 | 9.211587  | -0.778093 | 0.000000  | N                                 | -0.917275 | -1.547345 | 0.000000  |
| C                                 | 5.694875  | -1.763702 | 0.000000  | N                                 | 2.113604  | -2.136638 | 0.000000  |
| C                                 | 7.856993  | -0.599797 | 0.000000  | C                                 | 1.825834  | 1.415222  | 0.000000  |
| C                                 | 7.257744  | 0.640181  | 0.000000  | C                                 | -0.248349 | 0.652512  | 0.000000  |
| C                                 | 5.816965  | 0.702683  | 0.000000  | C                                 | 0.165722  | -0.686475 | 0.000000  |
| C                                 | 8.060510  | 1.911370  | 0.000000  | C                                 | 1.561736  | -0.910586 | 0.000000  |
| O                                 | 5.165866  | 1.767436  | 0.000000  | C                                 | -1.959418 | -0.739335 | 0.000000  |
| O                                 | 5.074867  | -2.822439 | 0.000000  | C                                 | -2.517310 | 1.754072  | 0.000000  |
| H                                 | 4.065127  | -0.486119 | 0.000000  | H                                 | 2.550262  | 2.230505  | 0.000000  |
| H                                 | 7.520532  | -2.669136 | 0.000000  | H                                 | -2.996555 | -1.059652 | 0.000000  |
| H                                 | 8.702009  | 2.002217  | -0.891764 | H                                 | 3.137092  | -2.249074 | 0.000000  |
| H                                 | 8.702009  | 2.002217  | 0.891764  | H                                 | 1.502914  | -2.941702 | 0.000000  |
| H                                 | 7.368967  | 2.760487  | 0.000000  | H                                 | -3.150374 | 1.756185  | -0.895768 |
| H                                 | 9.633543  | -1.694503 | 0.000000  | H                                 | -1.890679 | 2.651614  | 0.000000  |
| H                                 | 9.818617  | 0.027321  | 0.000000  | H                                 | -3.150374 | 1.756185  | 0.895768  |

| <i>2c no symmetry:</i> |           |           |           | <i>2c: C<sub>s</sub> symmetry</i> |           |           |           |
|------------------------|-----------|-----------|-----------|-----------------------------------|-----------|-----------|-----------|
| N                      | -0.933243 | 0.164250  | -0.099823 | N                                 | 1.865781  | 0.376536  | 0.000000  |
| N                      | -2.828069 | 1.646814  | -0.346689 | N                                 | -0.068817 | 1.836209  | 0.000000  |
| N                      | -4.950115 | 0.460047  | -0.069828 | N                                 | -2.165382 | 0.570202  | 0.000000  |
| N                      | -4.159120 | -1.626517 | 0.313162  | N                                 | -1.323293 | -1.531150 | 0.000000  |
| N                      | -1.126066 | -2.128595 | 0.311729  | N                                 | 1.704465  | -1.960019 | 0.000000  |
| C                      | -1.528079 | 1.354704  | -0.324101 | C                                 | 1.235742  | 1.568839  | 0.000000  |
| C                      | -3.574300 | 0.553792  | -0.108219 | C                                 | -0.792237 | 0.701689  | 0.000000  |
| C                      | -3.110134 | -0.746047 | 0.131494  | C                                 | -0.296738 | -0.606741 | 0.000000  |
| C                      | -1.707738 | -0.934272 | 0.117779  | C                                 | 1.111238  | -0.759693 | 0.000000  |
| C                      | -5.230714 | -0.868981 | 0.187879  | C                                 | -2.413670 | -0.789928 | 0.000000  |
| C                      | -5.887224 | 1.556779  | -0.265497 | C                                 | -3.128616 | 1.661754  | 0.000000  |
| H                      | -0.846628 | 2.183949  | -0.523611 | H                                 | 1.886278  | 2.447467  | 0.000000  |
| H                      | -6.254694 | -1.219165 | 0.269692  | H                                 | -3.428993 | -1.173611 | 0.000000  |
| H                      | -0.119124 | -2.261183 | 0.111358  | H                                 | 2.735504  | -2.061701 | 0.000000  |
| H                      | -1.730846 | -2.935525 | 0.396139  | H                                 | 1.111624  | -2.779685 | 0.000000  |
| H                      | -5.311122 | 2.433534  | -0.577134 | H                                 | -2.565413 | 2.600009  | 0.000000  |
| H                      | -6.418086 | 1.788443  | 0.666377  | H                                 | -3.760187 | 1.620695  | 0.895665  |
| H                      | -6.613311 | 1.304314  | -1.047224 | H                                 | -3.760187 | 1.620695  | -0.895665 |
| N                      | 3.721669  | -1.486201 | -0.468579 | N                                 | 6.604095  | -1.334145 | 0.000000  |
| N                      | 1.899954  | -0.134297 | -0.035426 | N                                 | 4.768958  | 0.067839  | 0.000000  |
| N                      | 2.073014  | 2.157303  | 0.293906  | N                                 | 4.965928  | 2.376036  | 0.000000  |
| C                      | 2.365858  | -1.405351 | -0.281518 | C                                 | 5.239922  | -1.225955 | 0.000000  |
| C                      | 2.728722  | 0.966334  | 0.043323  | C                                 | 5.603611  | 1.169337  | 0.000000  |
| C                      | 4.087177  | 0.877344  | -0.153249 | C                                 | 6.976710  | 1.046881  | 0.000000  |
| C                      | 4.659413  | -0.418465 | -0.442866 | C                                 | 7.553376  | -0.273752 | 0.000000  |
| C                      | 4.996758  | 2.071278  | -0.060885 | C                                 | 7.887678  | 2.242901  | 0.000000  |
| O                      | 5.849143  | -0.667991 | -0.641157 | O                                 | 8.752742  | -0.555329 | 0.000000  |
| O                      | 1.619256  | -2.394684 | -0.328276 | O                                 | 4.487786  | -2.212309 | 0.000000  |
| H                      | 4.101913  | -2.411520 | -0.650220 | H                                 | 6.985699  | -2.276393 | 0.000000  |
| H                      | 0.849782  | -0.011604 | -0.038820 | H                                 | 3.725658  | 0.188548  | 0.000000  |
| H                      | 4.927382  | 2.575710  | 0.917109  | H                                 | 7.748819  | 2.875724  | 0.891705  |
| H                      | 4.787991  | 2.818019  | -0.842796 | H                                 | 7.748819  | 2.875724  | -0.891705 |
| H                      | 6.030975  | 1.733510  | -0.187974 | H                                 | 8.924658  | 1.889879  | 0.000000  |
| H                      | 1.225734  | 2.087956  | 0.850105  | H                                 | 3.958816  | 2.436453  | 0.000000  |
| H                      | 2.674930  | 2.924594  | 0.571541  | H                                 | 5.504331  | 3.228380  | 0.000000  |

*2d no symmetry:*

|   |           |           |           |
|---|-----------|-----------|-----------|
| N | 1.963269  | 0.139042  | -3.981027 |
| N | 3.011504  | 0.082548  | -1.801589 |
| N | 1.373812  | 0.038084  | 0.004084  |
| N | -0.525274 | 0.020311  | -1.206645 |
| N | -0.329279 | 0.204057  | -4.330644 |
| C | 3.008348  | 0.104441  | -3.143868 |
| C | 1.760040  | 0.063903  | -1.325534 |
| C | 0.567208  | 0.062577  | -2.063370 |
| C | 0.707374  | 0.139189  | -3.474186 |
| C | 0.003175  | 0.014528  | 0.006659  |
| C | 2.269691  | 0.060579  | 1.150145  |
| H | 3.989574  | 0.103591  | -3.620923 |
| H | -0.563118 | 0.002319  | 0.932239  |
| H | -0.091095 | 0.341353  | -5.306081 |
| H | -1.287423 | 0.427664  | -4.026332 |
| H | 2.992371  | -0.759382 | 1.073520  |
| H | 2.818153  | 1.009391  | 1.185494  |
| H | 1.680231  | -0.054183 | 2.065228  |
| N | -5.152649 | 0.651556  | -2.928569 |
| N | -3.324959 | -0.105798 | -1.737488 |
| N | -3.500920 | -1.183864 | 0.311971  |
| C | -3.788099 | 0.518762  | -2.873541 |
| C | -4.160606 | -0.588389 | -0.750897 |
| C | -5.526641 | -0.448922 | -0.813605 |
| C | -6.099461 | 0.223934  | -1.959728 |
| C | -6.446455 | -0.985461 | 0.248365  |
| O | -7.296041 | 0.428572  | -2.165821 |
| O | -3.032875 | 0.923547  | -3.767242 |
| H | -5.532557 | 1.105775  | -3.755157 |
| H | -2.285161 | -0.079092 | -1.580008 |
| H | -6.314668 | -2.068419 | 0.408105  |
| H | -6.308820 | -0.480632 | 1.217218  |
| H | -7.481414 | -0.820323 | -0.070408 |
| H | -2.631018 | -1.652586 | 0.071868  |
| H | -4.097992 | -1.741051 | 0.914026  |

*2d: C<sub>s</sub> symmetry*

|   |           |           |           |
|---|-----------|-----------|-----------|
| N | 3.786431  | -2.235233 | 0.000000  |
| N | 4.874262  | -0.077918 | 0.000000  |
| N | 3.279955  | 1.757391  | 0.000000  |
| N | 1.343799  | 0.596119  | 0.000000  |
| N | 1.499377  | -2.557426 | 0.000000  |
| C | 4.846651  | -1.419803 | 0.000000  |
| C | 3.631121  | 0.419495  | 0.000000  |
| C | 2.419188  | -0.289621 | 0.000000  |
| C | 2.537262  | -1.707454 | 0.000000  |
| C | 1.910371  | 1.791869  | 0.000000  |
| C | 4.206202  | 2.878997  | 0.000000  |
| H | 5.818777  | -1.915436 | 0.000000  |
| H | 3.635317  | 3.813020  | 0.000000  |
| H | 1.724421  | -3.544875 | 0.000000  |
| H | 0.511116  | -2.270399 | 0.000000  |
| H | 4.844345  | 2.840065  | 0.890360  |
| H | 4.844345  | 2.840065  | -0.890360 |
| H | 1.388425  | 2.743847  | 0.000000  |
| N | -3.402507 | -1.319689 | 0.000000  |
| N | -1.584336 | 0.104844  | 0.000000  |
| N | -1.812816 | 2.410983  | 0.000000  |
| C | -2.038544 | -1.196507 | 0.000000  |
| C | -2.434725 | 1.195018  | 0.000000  |
| C | -3.805389 | 1.055811  | 0.000000  |
| C | -4.366180 | -0.272850 | 0.000000  |
| C | -4.729708 | 2.241892  | 0.000000  |
| O | -5.561907 | -0.568830 | 0.000000  |
| O | -1.274567 | -2.170392 | 0.000000  |
| H | -3.771849 | -2.266873 | 0.000000  |
| H | -0.549529 | 0.239321  | 0.000000  |
| H | -4.598226 | 2.876307  | 0.891818  |
| H | -4.598226 | 2.876307  | -0.891818 |
| H | -5.763144 | 1.878450  | 0.000000  |
| H | -0.807298 | 2.478443  | 0.000000  |
| H | -2.362554 | 3.256054  | 0.000000  |

*2e: C<sub>s</sub> symmetry*

|   |           |           |           |
|---|-----------|-----------|-----------|
| N | -4.608164 | -1.863671 | 0.000000  |
| N | -5.430174 | 0.413903  | 0.000000  |
| N | -3.610853 | 2.048145  | 0.000000  |
| N | -1.856774 | 0.643223  | 0.000000  |
| N | -2.354567 | -2.429563 | 0.000000  |
| C | -5.562733 | -0.921343 | 0.000000  |
| C | -4.137372 | 0.766272  | 0.000000  |
| C | -3.029849 | -0.091751 | 0.000000  |
| C | -3.309675 | -1.479917 | 0.000000  |
| C | -2.244684 | 1.905916  | 0.000000  |
| C | -4.384823 | 3.280997  | 0.000000  |
| H | -6.587338 | -1.296297 | 0.000000  |
| H | -1.561137 | 2.748857  | 0.000000  |
| H | -2.660230 | -3.394179 | 0.000000  |
| H | -1.352062 | -2.215095 | 0.000000  |
| H | -4.166262 | 3.874879  | 0.895658  |
| H | -5.442932 | 3.001748  | 0.000000  |
| H | -4.166262 | 3.874879  | -0.895658 |
| N | 0.896316  | 0.153196  | 0.000000  |
| N | 2.680745  | -1.317368 | 0.000000  |
| N | 4.907762  | -0.632892 | 0.000000  |
| C | 1.299630  | -1.143733 | 0.000000  |
| C | 3.588261  | -0.273437 | 0.000000  |
| C | 3.157188  | 1.031959  | 0.000000  |
| C | 1.732543  | 1.292896  | 0.000000  |
| C | 4.121932  | 2.185286  | 0.000000  |
| O | 1.211426  | 2.414052  | 0.000000  |
| O | 0.546264  | -2.125548 | 0.000000  |
| H | -0.148541 | 0.320751  | 0.000000  |
| H | 2.984654  | -2.285061 | 0.000000  |
| H | 4.770368  | 2.190116  | -0.891412 |
| H | 4.770368  | 2.190116  | 0.891412  |
| H | 3.548164  | 3.118355  | 0.000000  |
| H | 5.204698  | -1.597078 | 0.000000  |
| H | 5.617026  | 0.084113  | 0.000000  |

*2f: C<sub>s</sub> symmetry*

|   |           |           |           |
|---|-----------|-----------|-----------|
| N | 2.725645  | -2.442302 | 0.000000  |
| N | 3.869104  | -0.307381 | 0.000000  |
| N | 2.305948  | 1.572340  | 0.000000  |
| N | 0.366140  | 0.436562  | 0.000000  |
| N | 0.413002  | -2.675915 | 0.000000  |
| C | 3.806069  | -1.648078 | 0.000000  |
| C | 2.640412  | 0.227489  | 0.000000  |
| C | 1.420421  | -0.460773 | 0.000000  |
| C | 1.494528  | -1.876130 | 0.000000  |
| C | 0.933373  | 1.629812  | 0.000000  |
| C | 3.252079  | 2.678589  | 0.000000  |
| H | 4.765800  | -2.167019 | 0.000000  |
| H | 0.383818  | 2.565481  | 0.000000  |
| H | 0.578282  | -3.674303 | 0.000000  |
| H | -0.552939 | -2.320582 | 0.000000  |
| H | 4.257768  | 2.247017  | 0.000000  |
| H | 3.123820  | 3.298466  | 0.895633  |
| H | 3.123820  | 3.298466  | -0.895633 |
| N | -2.429365 | 0.277910  | 0.000000  |
| N | -4.436223 | 1.434629  | 0.000000  |
| N | -6.515665 | 0.383993  | 0.000000  |
| C | -3.039190 | 1.501607  | 0.000000  |
| C | -5.155205 | 0.256777  | 0.000000  |
| C | -4.510248 | -0.959988 | 0.000000  |
| C | -3.067349 | -0.969720 | 0.000000  |
| C | -5.266719 | -2.259555 | 0.000000  |
| O | -2.372241 | -2.003283 | 0.000000  |
| O | -2.455849 | 2.583012  | 0.000000  |
| H | -1.370623 | 0.287051  | 0.000000  |
| H | -4.897805 | 2.338090  | 0.000000  |
| H | -5.904682 | -2.373590 | -0.891676 |
| H | -5.904682 | -2.373590 | 0.891676  |
| H | -4.545528 | -3.083609 | 0.000000  |
| H | -6.973073 | 1.283274  | 0.000000  |
| H | -7.091745 | -0.443935 | 0.000000  |

*Cytosine — 3-methyl-6-aminouracil*

*2g no symmetry:*

|   |           |           |           |
|---|-----------|-----------|-----------|
| C | -3.340588 | 1.455631  | -0.245892 |
| C | -2.270651 | -0.590096 | 0.149631  |
| C | -4.685320 | -0.467293 | 0.138001  |
| C | -4.639231 | 0.871826  | -0.123941 |
| C | -3.586340 | -2.641489 | 0.538576  |
| N | -2.222363 | 0.752002  | -0.095294 |
| N | -3.554254 | -1.201569 | 0.273324  |
| N | -3.207695 | 2.786559  | -0.501231 |
| O | -1.272649 | -1.307241 | 0.268539  |
| H | -5.624343 | -1.006389 | 0.245603  |
| H | -5.552035 | 1.450805  | -0.233493 |
| H | -4.006350 | 3.326858  | -0.802819 |
| H | -2.287196 | 3.123462  | -0.757716 |
| H | -3.061695 | -2.859347 | 1.475450  |
| H | -4.630019 | -2.963976 | 0.607604  |
| H | -3.076838 | -3.180441 | -0.267914 |
| N | 3.711840  | -1.117612 | -0.415638 |
| N | 1.468267  | -0.573375 | -0.275655 |
| N | 0.733410  | 1.598029  | 0.122893  |
| C | 2.410644  | -1.574630 | -0.475229 |
| C | 1.794261  | 0.741936  | -0.010551 |
| C | 3.107219  | 1.160824  | 0.071509  |
| C | 4.159913  | 0.197692  | -0.134647 |
| C | 3.467597  | 2.595031  | 0.339874  |
| O | 5.375805  | 0.417927  | -0.098502 |
| O | 2.105937  | -2.745082 | -0.681757 |
| H | 4.436744  | -1.815551 | -0.556769 |
| H | 0.489236  | -0.883165 | -0.179783 |
| H | 3.122292  | 2.941551  | 1.329190  |
| H | 4.559016  | 2.689502  | 0.320837  |
| H | 3.051570  | 3.277921  | -0.418722 |
| H | 0.915588  | 2.473339  | 0.594464  |
| H | -0.227569 | 1.244338  | 0.148890  |

*2g: C<sub>s</sub> symmetry*

|   |           |           |           |
|---|-----------|-----------|-----------|
| C | 1.403056  | 0.316986  | 0.000000  |
| C | -0.328496 | -1.258408 | 0.000000  |
| C | -0.840762 | 1.105052  | 0.000000  |
| C | 0.488058  | 1.415587  | 0.000000  |
| C | -2.687471 | -0.533296 | 0.000000  |
| N | 1.002341  | -0.952154 | 0.000000  |
| N | -1.265724 | -0.181666 | 0.000000  |
| N | 2.740394  | 0.549259  | 0.000000  |
| O | -0.776082 | -2.409125 | 0.000000  |
| H | -1.616125 | 1.868533  | 0.000000  |
| H | 0.819534  | 2.450270  | 0.000000  |
| H | 3.114410  | 1.486023  | 0.000000  |
| H | 3.377096  | -0.235967 | 0.000000  |
| H | -2.923310 | -1.132764 | 0.886276  |
| H | -3.278070 | 0.388312  | 0.000000  |
| H | -2.923310 | -1.132764 | -0.886276 |
| N | 0.515541  | -7.292132 | 0.000000  |
| N | 0.496184  | -4.980906 | 0.000000  |
| N | 2.442952  | -3.717461 | 0.000000  |
| C | -0.255983 | -6.147965 | 0.000000  |
| C | 1.875888  | -4.957441 | 0.000000  |
| C | 2.619273  | -6.122636 | 0.000000  |
| C | 1.930584  | -7.387555 | 0.000000  |
| C | 4.122208  | -6.105797 | 0.000000  |
| O | 2.450921  | -8.509408 | 0.000000  |
| O | -1.483315 | -6.149749 | 0.000000  |
| H | 0.008848  | -8.172787 | 0.000000  |
| H | -0.026611 | -4.093008 | 0.000000  |
| H | 4.538835  | -5.607073 | 0.891522  |
| H | 4.481110  | -7.141094 | 0.000000  |
| H | 4.538835  | -5.607073 | -0.891522 |
| H | 3.449734  | -3.660096 | 0.000000  |
| H | 1.899234  | -2.851700 | 0.000000  |

*2h: C<sub>s</sub> symmetry*

|   |           |           |           |
|---|-----------|-----------|-----------|
| C | -3.009866 | 1.209792  | 0.000000  |
| C | -2.989235 | -1.150046 | 0.000000  |
| C | -5.089646 | 0.044712  | 0.000000  |
| C | -4.445094 | 1.242233  | 0.000000  |
| C | -5.145629 | -2.407066 | 0.000000  |
| N | -2.344496 | 0.045432  | 0.000000  |
| N | -4.413891 | -1.137836 | 0.000000  |
| N | -2.289565 | 2.339848  | 0.000000  |
| O | -2.398431 | -2.242345 | 0.000000  |
| H | -6.175989 | -0.029570 | 0.000000  |
| H | -5.001024 | 2.175972  | 0.000000  |
| H | -2.761800 | 3.232768  | 0.000000  |
| H | -1.243422 | 2.307217  | 0.000000  |
| H | -4.405696 | -3.210182 | 0.000000  |
| H | -5.773573 | -2.484833 | -0.896716 |
| H | -5.773573 | -2.484833 | 0.896716  |
| N | 2.483975  | 1.158987  | 0.000000  |
| N | 0.519013  | -0.042494 | 0.000000  |
| N | 0.454384  | -2.351724 | 0.000000  |
| C | 1.119162  | 1.188771  | 0.000000  |
| C | 1.222614  | -1.236338 | 0.000000  |
| C | 2.607289  | -1.248870 | 0.000000  |
| C | 3.317428  | -0.001188 | 0.000000  |
| C | 3.383979  | -2.535828 | 0.000000  |
| O | 4.540937  | 0.162223  | 0.000000  |
| O | 0.468325  | 2.253056  | 0.000000  |
| H | 2.965094  | 2.054056  | 0.000000  |
| H | -0.528385 | -0.046195 | 0.000000  |
| H | 3.174090  | -3.150647 | -0.890751 |
| H | 3.174090  | -3.150647 | 0.890751  |
| H | 4.453724  | -2.300139 | 0.000000  |
| H | 0.911253  | -3.251138 | 0.000000  |
| H | -0.576113 | -2.310004 | 0.000000  |



*2i no symmetry:*

|   |           |           |           |
|---|-----------|-----------|-----------|
| C | 2.554295  | 1.396190  | -0.338759 |
| C | 2.768779  | -0.769833 | 0.569184  |
| C | 4.725886  | 0.411096  | -0.275111 |
| C | 3.961266  | 1.491139  | -0.602939 |
| C | 4.988831  | -1.849524 | 0.669855  |
| N | 2.001141  | 0.300282  | 0.186832  |
| N | 4.181373  | -0.695654 | 0.285602  |
| N | 1.734139  | 2.429188  | -0.633700 |
| O | 2.344653  | -1.773345 | 1.129529  |
| H | 5.801957  | 0.389045  | -0.440930 |
| H | 4.406612  | 2.378319  | -1.045003 |
| H | 2.130476  | 3.303368  | -0.946984 |
| H | 0.759870  | 2.410983  | -0.286860 |
| H | 6.023365  | -1.680630 | 0.352082  |
| H | 4.592679  | -2.754913 | 0.196308  |
| H | 4.949596  | -1.995466 | 1.756243  |
| N | -0.909944 | -0.016449 | 0.105154  |
| N | -2.875712 | 1.150505  | 0.479891  |
| N | -4.999410 | 0.182945  | 0.504335  |
| C | -1.497209 | 1.192350  | 0.316983  |
| C | -3.630772 | -0.005251 | 0.367246  |
| C | -3.037202 | -1.203943 | 0.086829  |
| C | -1.590327 | -1.249381 | -0.092340 |
| C | -3.818169 | -2.483215 | -0.035244 |
| O | -0.952665 | -2.257617 | -0.377615 |
| O | -0.903116 | 2.280988  | 0.366138  |
| H | 0.140206  | -0.023200 | 0.096509  |
| H | -3.325839 | 2.059518  | 0.503063  |
| H | -4.475159 | -2.492367 | -0.919097 |
| H | -4.440596 | -2.677997 | 0.853430  |
| H | -3.109429 | -3.312269 | -0.138819 |
| H | -5.522502 | -0.683148 | 0.585588  |
| H | -5.279092 | 0.861941  | 1.208251  |

*2i: C<sub>s</sub> symmetry*

|   |           |           |           |
|---|-----------|-----------|-----------|
| C | 1.147509  | 1.289671  | 0.000000  |
| C | 1.357717  | -1.058968 | 0.000000  |
| C | 3.342807  | 0.360676  | 0.000000  |
| C | 2.571024  | 1.481609  | 0.000000  |
| C | 3.645120  | -2.068212 | 0.000000  |
| N | 0.587871  | 0.077356  | 0.000000  |
| N | 2.794322  | -0.879324 | 0.000000  |
| N | 0.329403  | 2.361254  | 0.000000  |
| O | 0.906034  | -2.196902 | 0.000000  |
| H | 4.431591  | 0.405652  | 0.000000  |
| H | 3.019224  | 2.471723  | 0.000000  |
| H | 0.719847  | 3.291704  | 0.000000  |
| H | -0.696104 | 2.229854  | 0.000000  |
| H | 4.278734  | -2.089168 | -0.896764 |
| H | 2.978906  | -2.935079 | 0.000000  |
| H | 4.278734  | -2.089168 | 0.896764  |
| N | -2.432928 | -0.321179 | 0.000000  |
| N | -4.409952 | 0.887401  | 0.000000  |
| N | -6.530767 | -0.079437 | 0.000000  |
| C | -3.021550 | 0.903908  | 0.000000  |
| C | -5.174414 | -0.266225 | 0.000000  |
| C | -4.571984 | -1.496323 | 0.000000  |
| C | -3.121060 | -1.575431 | 0.000000  |
| C | -5.366096 | -2.772863 | 0.000000  |
| O | -2.477263 | -2.617724 | 0.000000  |
| O | -2.432487 | 1.996349  | 0.000000  |
| H | -1.389043 | -0.335327 | 0.000000  |
| H | -4.835248 | 1.807794  | 0.000000  |
| H | -6.006864 | -2.868420 | -0.891781 |
| H | -6.006864 | -2.868420 | 0.891781  |
| H | -4.664470 | -3.614250 | 0.000000  |
| H | -7.140591 | -0.882495 | 0.000000  |
| H | -6.949335 | 0.838284  | 0.000000  |

*2j no symmetry:*

|   |           |           |           |
|---|-----------|-----------|-----------|
| C | 2.183357  | 1.467604  | -0.317963 |
| C | 2.578032  | -0.759703 | 0.356064  |
| C | 4.439025  | 0.691583  | -0.251040 |
| C | 3.583872  | 1.723166  | -0.499921 |
| C | 4.890265  | -1.625923 | 0.454675  |
| N | 1.723752  | 0.269955  | 0.058169  |
| N | 3.986443  | -0.518605 | 0.158606  |
| N | 1.276637  | 2.442459  | -0.535634 |
| O | 2.234618  | -1.859221 | 0.775089  |
| H | 5.517744  | 0.791186  | -0.362095 |
| H | 3.955307  | 2.693108  | -0.819311 |
| H | 1.595864  | 3.377319  | -0.744569 |
| H | 0.288855  | 2.291479  | -0.247498 |
| H | 5.915950  | -1.318037 | 0.224347  |
| H | 4.617207  | -2.501503 | -0.145352 |
| H | 4.812219  | -1.907283 | 1.511903  |
| N | -1.128867 | -0.251843 | -0.147314 |
| N | -3.004860 | -1.614962 | -0.299826 |
| N | -5.189535 | -0.865165 | 0.031448  |
| C | -1.610566 | -1.510394 | -0.435968 |
| C | -3.839612 | -0.566918 | 0.011879  |
| C | -3.333715 | 0.691713  | 0.229076  |
| C | -1.904111 | 0.879580  | 0.125472  |
| C | -4.214790 | 1.861229  | 0.572672  |
| O | -1.346105 | 1.986843  | 0.277412  |
| O | -0.941107 | -2.469700 | -0.781923 |
| H | -0.082364 | -0.136482 | -0.109159 |
| H | -3.380535 | -2.508690 | -0.600149 |
| H | -4.820930 | 1.675880  | 1.475030  |
| H | -4.900614 | 2.126504  | -0.247316 |
| H | -3.580739 | 2.731375  | 0.772314  |
| H | -5.772769 | -0.152578 | 0.456628  |
| H | -5.440187 | -1.805189 | 0.323449  |

*2j: C<sub>s</sub> symmetry*

|   |           |           |           |
|---|-----------|-----------|-----------|
| C | 1.093669  | 1.287751  | 0.000000  |
| C | 1.391393  | -1.053676 | 0.000000  |
| C | 3.322710  | 0.438711  | 0.000000  |
| C | 2.509999  | 1.530081  | 0.000000  |
| C | 3.715156  | -1.977132 | 0.000000  |
| N | 0.580416  | 0.053069  | 0.000000  |
| N | 2.820703  | -0.821191 | 0.000000  |
| N | 0.236146  | 2.325240  | 0.000000  |
| O | 0.982976  | -2.208699 | 0.000000  |
| H | 4.409037  | 0.523626  | 0.000000  |
| H | 2.921081  | 2.536175  | 0.000000  |
| H | 0.593749  | 3.269002  | 0.000000  |
| H | -0.790345 | 2.157768  | 0.000000  |
| H | 4.349246  | -1.974415 | -0.896666 |
| H | 3.081428  | -2.868025 | 0.000000  |
| H | 4.349246  | -1.974415 | 0.896666  |
| N | -2.404645 | -0.371664 | 0.000000  |
| N | -4.373437 | -1.611304 | 0.000000  |
| N | -6.497915 | -0.658715 | 0.000000  |
| C | -2.967868 | -1.630708 | 0.000000  |
| C | -5.144375 | -0.473465 | 0.000000  |
| C | -4.550453 | 0.768731  | 0.000000  |
| C | -3.111267 | 0.839463  | 0.000000  |
| C | -5.360325 | 2.035639  | 0.000000  |
| O | -2.483437 | 1.919342  | 0.000000  |
| O | -2.363868 | -2.688817 | 0.000000  |
| H | -1.358546 | -0.318506 | 0.000000  |
| H | -4.789786 | -2.536463 | 0.000000  |
| H | -6.002730 | 2.122770  | 0.891691  |
| H | -6.002730 | 2.122770  | -0.891691 |
| H | -4.674534 | 2.889116  | 0.000000  |
| H | -7.110111 | 0.142718  | 0.000000  |
| H | -6.913752 | -1.577931 | 0.000000  |

*Guanine — 3-methyl-6-aminouracil*

*2k no symmetry:*

|   |           |           |           |
|---|-----------|-----------|-----------|
| N | 3.453506  | -1.866997 | 0.067429  |
| N | 4.399670  | 0.309440  | 0.107148  |
| N | 2.663285  | 2.015579  | -0.030212 |
| N | 0.834686  | 0.715749  | -0.115443 |
| N | 5.776797  | -1.563677 | 0.158691  |
| C | 4.522007  | -1.001052 | 0.127291  |
| C | 3.110045  | 0.714377  | 0.010513  |
| C | 1.957862  | -0.074623 | -0.043027 |
| C | 2.076711  | -1.496567 | -0.011348 |
| C | 1.284517  | 1.952210  | -0.104462 |
| C | 3.494150  | 3.211331  | 0.003046  |
| O | 1.205842  | -2.369207 | -0.044253 |
| H | 3.613840  | -2.871399 | 0.032397  |
| H | 0.651879  | 2.833239  | -0.139376 |
| H | 6.512521  | -0.895195 | 0.362705  |
| H | 5.886315  | -2.462575 | 0.614666  |
| H | 2.843121  | 4.090256  | -0.010529 |
| H | 4.102216  | 3.222721  | 0.914824  |
| H | 4.158598  | 3.236652  | -0.868416 |
| N | -4.003821 | 1.364455  | 0.098513  |
| N | -1.975827 | 0.280790  | -0.087091 |
| N | -1.786201 | -2.029622 | -0.220288 |
| C | -2.637301 | 1.489736  | 0.008196  |
| C | -2.605606 | -0.947134 | -0.085761 |
| C | -3.981743 | -1.045881 | 0.012863  |
| C | -4.761526 | 0.160446  | 0.112267  |
| C | -4.685118 | -2.374646 | 0.009926  |
| O | -5.991544 | 0.240252  | 0.205758  |
| O | -2.041192 | 2.571259  | 0.011044  |
| H | -4.536993 | 2.226404  | 0.169800  |
| H | -0.938542 | 0.354674  | -0.129954 |
| H | -4.514284 | -2.937218 | -0.922503 |
| H | -4.375559 | -3.017179 | 0.851506  |
| H | -5.762557 | -2.199907 | 0.104395  |
| H | -0.769886 | -1.966696 | -0.126178 |
| H | -2.195588 | -2.941796 | -0.076888 |

*2k: C<sub>s</sub> symmetry*

|   |           |           |           |
|---|-----------|-----------|-----------|
| N | -3.422531 | -2.136601 | 0.000000  |
| N | -4.414044 | 0.021580  | 0.000000  |
| N | -2.710011 | 1.763129  | 0.000000  |
| N | -0.852364 | 0.501780  | 0.000000  |
| N | -5.746856 | -1.867478 | 0.000000  |
| C | -4.511802 | -1.293021 | 0.000000  |
| C | -3.131234 | 0.452739  | 0.000000  |
| C | -1.961468 | -0.312271 | 0.000000  |
| C | -2.052211 | -1.734114 | 0.000000  |
| C | -1.326350 | 1.728690  | 0.000000  |
| C | -3.572768 | 2.938116  | 0.000000  |
| O | -1.163508 | -2.590166 | 0.000000  |
| H | -3.552554 | -3.145735 | 0.000000  |
| H | -0.708878 | 2.620952  | 0.000000  |
| H | -6.549615 | -1.254372 | 0.000000  |
| H | -5.886997 | -2.865849 | 0.000000  |
| H | -3.394259 | 3.544909  | 0.895421  |
| H | -4.609618 | 2.590066  | 0.000000  |
| H | -3.394259 | 3.544909  | -0.895421 |
| N | 3.989885  | 1.183697  | 0.000000  |
| N | 1.966425  | 0.075076  | 0.000000  |
| N | 1.797783  | -2.239076 | 0.000000  |
| C | 2.619374  | 1.292705  | 0.000000  |
| C | 2.608838  | -1.146953 | 0.000000  |
| C | 3.990310  | -1.228282 | 0.000000  |
| C | 4.759207  | -0.012524 | 0.000000  |
| C | 4.710443  | -2.548047 | 0.000000  |
| O | 5.991612  | 0.081502  | 0.000000  |
| O | 2.012634  | 2.367834  | 0.000000  |
| H | 4.516957  | 2.052261  | 0.000000  |
| H | 0.927998  | 0.141617  | 0.000000  |
| H | 4.477587  | -3.154809 | -0.890998 |
| H | 4.477587  | -3.154809 | 0.890998  |
| H | 5.789077  | -2.355416 | 0.000000  |
| H | 0.776669  | -2.190787 | 0.000000  |
| H | 2.224723  | -3.153012 | 0.000000  |

*21 no symmetry:*

|   |           |           |           |
|---|-----------|-----------|-----------|
| N | 2.796229  | 1.888995  | 0.292635  |
| N | 4.514160  | 0.295997  | -0.068966 |
| N | 3.593038  | -1.941153 | -0.307466 |
| N | 1.396313  | -1.513249 | -0.032728 |
| N | 5.038205  | 2.550550  | 0.132857  |
| C | 4.114442  | 1.535638  | 0.130703  |
| C | 3.486310  | -0.584915 | -0.107587 |
| C | 2.118973  | -0.341594 | 0.059469  |
| C | 1.677913  | 1.000530  | 0.280368  |
| C | 2.304569  | -2.440665 | -0.251699 |
| C | 4.826871  | -2.680730 | -0.531835 |
| O | 0.547209  | 1.456344  | 0.444534  |
| H | 2.534876  | 2.868741  | 0.385193  |
| H | 2.107773  | -3.499298 | -0.380203 |
| H | 6.000370  | 2.232546  | 0.173438  |
| H | 4.838469  | 3.389360  | 0.664960  |
| H | 5.508148  | -2.545477 | 0.316131  |
| H | 5.321203  | -2.326994 | -1.444033 |
| H | 4.586544  | -3.742826 | -0.638036 |
| N | -4.378571 | 1.249593  | -0.378264 |
| N | -2.192225 | 0.606581  | 0.016125  |
| N | -1.614980 | -1.571654 | 0.610657  |
| C | -3.058610 | 1.644651  | -0.306190 |
| C | -2.602788 | -0.689966 | 0.258256  |
| C | -3.935231 | -1.047878 | 0.185704  |
| C | -4.913124 | -0.042516 | -0.146754 |
| C | -4.396412 | -2.455418 | 0.443288  |
| O | -6.133867 | -0.208817 | -0.250799 |
| O | -2.676613 | 2.793517  | -0.505887 |
| H | -5.049874 | 1.975228  | -0.613362 |
| H | -1.207539 | 0.874108  | 0.145783  |
| H | -4.187186 | -2.785294 | 1.474090  |
| H | -3.933023 | -3.183530 | -0.244161 |
| H | -5.480685 | -2.498723 | 0.291404  |
| H | -0.639445 | -1.410933 | 0.338741  |
| H | -1.891433 | -2.545008 | 0.625657  |

*21: C<sub>s</sub> symmetry*

|   |           |           |           |
|---|-----------|-----------|-----------|
| N | -0.015436 | -2.563719 | 0.000000  |
| N | 1.071309  | -0.455521 | 0.000000  |
| N | -0.544369 | 1.360580  | 0.000000  |
| N | -2.473501 | 0.193004  | 0.000000  |
| N | 2.317892  | -2.402117 | 0.000000  |
| C | 1.110693  | -1.774314 | 0.000000  |
| C | -0.190581 | 0.031203  | 0.000000  |
| C | -1.399372 | -0.673311 | 0.000000  |
| C | -1.367550 | -2.100924 | 0.000000  |
| C | -1.928172 | 1.391147  | 0.000000  |
| C | 0.374741  | 2.491194  | 0.000000  |
| O | -2.281762 | -2.924295 | 0.000000  |
| H | 0.062602  | -3.578732 | 0.000000  |
| H | -2.470847 | 2.329841  | 0.000000  |
| H | 3.147877  | -1.826172 | 0.000000  |
| H | 2.412522  | -3.406084 | 0.000000  |
| H | 0.228457  | 3.106226  | -0.896000 |
| H | 1.393208  | 2.092108  | 0.000000  |
| H | 0.228457  | 3.106226  | 0.896000  |
| N | -7.019522 | -4.510758 | 0.000000  |
| N | -5.177796 | -3.110992 | 0.000000  |
| N | -5.382543 | -0.790270 | 0.000000  |
| C | -5.643682 | -4.421300 | 0.000000  |
| C | -6.002608 | -2.002374 | 0.000000  |
| C | -7.380288 | -2.132168 | 0.000000  |
| C | -7.960216 | -3.449348 | 0.000000  |
| C | -8.288319 | -0.934255 | 0.000000  |
| O | -9.166015 | -3.725264 | 0.000000  |
| O | -4.894714 | -5.393567 | 0.000000  |
| H | -7.406135 | -5.450276 | 0.000000  |
| H | -4.155300 | -3.005014 | 0.000000  |
| H | -8.149305 | -0.299315 | -0.891317 |
| H | -8.149305 | -0.299315 | 0.891317  |
| H | -9.326201 | -1.285529 | 0.000000  |
| H | -4.370268 | -0.648061 | 0.000000  |
| H | -5.965400 | 0.033205  | 0.000000  |

*2m: C<sub>s</sub> symmetry*

|   |           |           |           |
|---|-----------|-----------|-----------|
| N | 2.127502  | -1.331086 | 0.000000  |
| N | 4.385699  | -2.075877 | 0.000000  |
| N | 5.919795  | -0.197292 | 0.000000  |
| N | 4.464026  | 1.533530  | 0.000000  |
| N | 2.627284  | -3.592802 | 0.000000  |
| C | 3.084314  | -2.312532 | 0.000000  |
| C | 4.663774  | -0.754377 | 0.000000  |
| C | 3.774994  | 0.334900  | 0.000000  |
| C | 2.378246  | 0.053136  | 0.000000  |
| C | 5.727476  | 1.178388  | 0.000000  |
| C | 7.178010  | -0.927963 | 0.000000  |
| O | 1.414605  | 0.851635  | 0.000000  |
| H | 1.121754  | -1.629636 | 0.000000  |
| H | 6.571879  | 1.859913  | 0.000000  |
| H | 3.302954  | -4.342355 | 0.000000  |
| H | 1.636930  | -3.796675 | 0.000000  |
| H | 7.764738  | -0.688359 | -0.895462 |
| H | 6.942780  | -1.996479 | 0.000000  |
| H | 7.764738  | -0.688359 | 0.895462  |
| N | -2.710271 | -1.727266 | 0.000000  |
| N | -1.123447 | -0.061956 | 0.000000  |
| N | -1.638615 | 2.182704  | 0.000000  |
| C | -1.385831 | -1.402797 | 0.000000  |
| C | -2.109648 | 0.905623  | 0.000000  |
| C | -3.449880 | 0.573612  | 0.000000  |
| C | -3.814876 | -0.818820 | 0.000000  |
| C | -4.533343 | 1.616140  | 0.000000  |
| O | -4.953692 | -1.288816 | 0.000000  |
| O | -0.474540 | -2.260051 | 0.000000  |
| H | -2.948519 | -2.715234 | 0.000000  |
| H | -0.109765 | 0.238850  | 0.000000  |
| H | -4.490618 | 2.262950  | -0.891277 |
| H | -4.490618 | 2.262950  | 0.891277  |
| H | -5.505387 | 1.111255  | 0.000000  |
| H | -0.643119 | 2.369507  | 0.000000  |
| H | -2.283775 | 2.957394  | 0.000000  |

*2n: C<sub>s</sub> symmetry*

|   |           |           |           |
|---|-----------|-----------|-----------|
| N | 3.098578  | 0.825689  | 0.000000  |
| N | 5.389373  | 1.450462  | 0.000000  |
| N | 6.824500  | -0.505536 | 0.000000  |
| N | 5.284220  | -2.159492 | 0.000000  |
| N | 3.719368  | 3.061667  | 0.000000  |
| C | 4.103310  | 1.753329  | 0.000000  |
| C | 5.596580  | 0.112817  | 0.000000  |
| C | 4.655040  | -0.929181 | 0.000000  |
| C | 3.266160  | -0.580619 | 0.000000  |
| C | 6.564237  | -1.869758 | 0.000000  |
| C | 8.116108  | 0.161810  | 0.000000  |
| O | 2.263940  | -1.311667 | 0.000000  |
| H | 2.108892  | 1.150456  | 0.000000  |
| H | 7.373093  | -2.593121 | 0.000000  |
| H | 4.437950  | 3.769923  | 0.000000  |
| H | 2.744213  | 3.323381  | 0.000000  |
| H | 8.691314  | -0.105671 | 0.895339  |
| H | 7.933841  | 1.240750  | 0.000000  |
| H | 8.691314  | -0.105671 | -0.895339 |
| N | -0.377276 | -0.378877 | 0.000000  |
| N | -1.768501 | 1.469598  | 0.000000  |
| N | -4.096622 | 1.343644  | 0.000000  |
| C | -0.475553 | 0.971962  | 0.000000  |
| C | -2.903547 | 0.674059  | 0.000000  |
| C | -2.794280 | -0.692170 | 0.000000  |
| C | -1.473431 | -1.294107 | 0.000000  |
| C | -4.001507 | -1.588084 | 0.000000  |
| O | -1.246448 | -2.499633 | 0.000000  |
| O | 0.484231  | 1.768521  | 0.000000  |
| H | 0.592587  | -0.784821 | 0.000000  |
| H | -1.830712 | 2.481584  | 0.000000  |
| H | -4.632126 | -1.441238 | -0.891830 |
| H | -4.632126 | -1.441238 | 0.891830  |
| H | -3.658761 | -2.628509 | 0.000000  |
| H | -4.152482 | 2.350809  | 0.000000  |
| H | -4.957680 | 0.818511  | 0.000000  |

*2o: C<sub>s</sub> symmetry*

|   |           |           |           |
|---|-----------|-----------|-----------|
| N | -0.749605 | -1.325131 | 0.000000  |
| N | -1.502592 | -3.576700 | 0.000000  |
| N | -3.925235 | -3.680680 | 0.000000  |
| N | -4.444368 | -1.480968 | 0.000000  |
| N | 0.766472  | -3.074174 | 0.000000  |
| C | -0.536354 | -2.674098 | 0.000000  |
| C | -2.728437 | -3.004023 | 0.000000  |
| C | -3.071459 | -1.641721 | 0.000000  |
| C | -2.006753 | -0.685283 | 0.000000  |
| C | -4.914808 | -2.706315 | 0.000000  |
| C | -4.083960 | -5.125592 | 0.000000  |
| O | -2.054366 | 0.557257  | 0.000000  |
| H | 0.082902  | -0.686010 | 0.000000  |
| H | -5.965716 | -2.977080 | 0.000000  |
| H | 0.965211  | -4.063108 | 0.000000  |
| H | 1.517916  | -2.398441 | 0.000000  |
| H | -4.624337 | -5.457517 | 0.895461  |
| H | -3.083583 | -5.569288 | 0.000000  |
| H | -4.624337 | -5.457517 | -0.895461 |
| N | 0.232014  | 2.117596  | 0.000000  |
| N | 1.246347  | 4.210180  | 0.000000  |
| N | 3.554179  | 4.515930  | 0.000000  |
| C | 0.045098  | 3.481920  | 0.000000  |
| C | 2.500596  | 3.649017  | 0.000000  |
| C | 2.651376  | 2.277672  | 0.000000  |
| C | 1.466576  | 1.465125  | 0.000000  |
| C | 4.009390  | 1.631718  | 0.000000  |
| O | 1.497126  | 0.209071  | 0.000000  |
| O | -1.032486 | 4.053602  | 0.000000  |
| H | -0.645460 | 1.527453  | 0.000000  |
| H | 1.113729  | 5.216328  | 0.000000  |
| H | 4.600201  | 1.897756  | 0.891678  |
| H | 4.600201  | 1.897756  | -0.891678 |
| H | 3.882714  | 0.544499  | 0.000000  |
| H | 3.426356  | 5.516954  | 0.000000  |
| H | 4.496360  | 4.155705  | 0.000000  |

*Thymine — 3-methyl-6-aminouracil*

*2p: C<sub>s</sub> symmetry*

|   |           |           |           |
|---|-----------|-----------|-----------|
| C | -2.674668 | -1.364966 | 0.000000  |
| C | -1.441440 | 0.798168  | 0.000000  |
| C | -3.857439 | 0.746629  | 0.000000  |
| C | -3.929409 | -0.605647 | 0.000000  |
| C | -5.218509 | -1.370697 | 0.000000  |
| C | -2.697583 | 2.916452  | 0.000000  |
| N | -1.507715 | -0.567909 | 0.000000  |
| N | -2.665854 | 1.453851  | 0.000000  |
| O | -2.597104 | -2.586862 | 0.000000  |
| O | -0.365916 | 1.430323  | 0.000000  |
| H | -0.589977 | -1.073840 | 0.000000  |
| H | -4.749998 | 1.371662  | 0.000000  |
| H | -6.083849 | -0.697263 | 0.000000  |
| H | -5.278080 | -2.026808 | 0.878878  |
| H | -5.278080 | -2.026808 | -0.878878 |
| H | -1.666622 | 3.274617  | 0.000000  |
| H | -3.212835 | 3.284981  | 0.896060  |
| H | -3.212835 | 3.284981  | -0.896060 |
| N | 3.312869  | -1.777181 | 0.000000  |
| N | 2.112694  | 0.191106  | 0.000000  |
| N | 3.104497  | 2.279622  | 0.000000  |
| C | 2.080211  | -1.183740 | 0.000000  |
| C | 3.281060  | 0.926101  | 0.000000  |
| C | 4.517796  | 0.317087  | 0.000000  |
| C | 4.579593  | -1.124089 | 0.000000  |
| C | 5.798500  | 1.104815  | 0.000000  |
| O | 5.598955  | -1.815941 | 0.000000  |
| O | 1.015062  | -1.819282 | 0.000000  |
| H | 3.332424  | -2.793655 | 0.000000  |
| H | 1.182600  | 0.659034  | 0.000000  |
| H | 5.896472  | 1.745409  | -0.891613 |
| H | 6.639351  | 0.402694  | 0.000000  |
| H | 5.896472  | 1.745409  | 0.891613  |
| H | 2.179350  | 2.685528  | 0.000000  |
| H | 3.906458  | 2.890530  | 0.000000  |

*2q: C<sub>s</sub> symmetry*

|   |           |           |           |
|---|-----------|-----------|-----------|
| C | 3.078444  | -0.106805 | 0.000000  |
| C | 0.933741  | -1.383804 | 0.000000  |
| C | 3.063780  | -2.528920 | 0.000000  |
| C | 3.794188  | -1.386292 | 0.000000  |
| C | 5.293541  | -1.358557 | 0.000000  |
| C | 0.978461  | -3.843985 | 0.000000  |
| N | 1.674849  | -0.227332 | 0.000000  |
| N | 1.681578  | -2.560428 | 0.000000  |
| O | 3.616124  | 0.996814  | 0.000000  |
| O | -0.304598 | -1.398552 | 0.000000  |
| H | 1.114700  | 0.649387  | 0.000000  |
| H | 3.535537  | -3.511391 | 0.000000  |
| H | 5.712259  | -2.372401 | 0.000000  |
| H | 5.671266  | -0.819040 | 0.879308  |
| H | 5.671266  | -0.819040 | -0.879308 |
| H | -0.093619 | -3.635290 | 0.000000  |
| H | 1.239599  | -4.420925 | 0.896501  |
| H | 1.239599  | -4.420925 | -0.896501 |
| N | -2.033025 | 0.853044  | 0.000000  |
| N | -2.019759 | 3.165522  | 0.000000  |
| N | -3.955164 | 4.463303  | 0.000000  |
| C | -1.282557 | 1.988189  | 0.000000  |
| C | -3.403139 | 3.211853  | 0.000000  |
| C | -4.143085 | 2.054866  | 0.000000  |
| C | -3.453674 | 0.779206  | 0.000000  |
| C | -5.646422 | 2.074628  | 0.000000  |
| O | -3.996138 | -0.325269 | 0.000000  |
| O | -0.045185 | 2.031741  | 0.000000  |
| H | -1.498482 | -0.036239 | 0.000000  |
| H | -1.458427 | 4.010384  | 0.000000  |
| H | -6.059180 | 2.574299  | 0.891681  |
| H | -6.006793 | 1.040133  | 0.000000  |
| H | -6.059180 | 2.574299  | -0.891681 |
| H | -3.393506 | 5.301321  | 0.000000  |
| H | -4.958939 | 4.561242  | 0.000000  |

*2r: C<sub>s</sub> symmetry*

|   |           |           |           |
|---|-----------|-----------|-----------|
| C | -2.534127 | -1.673537 | 0.000000  |
| C | -1.550338 | 0.613301  | 0.000000  |
| C | -3.946297 | 0.294970  | 0.000000  |
| C | -3.865395 | -1.058100 | 0.000000  |
| C | -5.061473 | -1.962067 | 0.000000  |
| C | -3.027061 | 2.581760  | 0.000000  |
| N | -1.467185 | -0.755146 | 0.000000  |
| N | -2.844445 | 1.130239  | 0.000000  |
| O | -2.326275 | -2.883010 | 0.000000  |
| O | -0.556265 | 1.354837  | 0.000000  |
| H | -0.491413 | -1.135264 | 0.000000  |
| H | -4.904617 | 0.814112  | 0.000000  |
| H | -5.996144 | -1.388345 | 0.000000  |
| H | -5.048862 | -2.620877 | 0.879031  |
| H | -5.048862 | -2.620877 | -0.879031 |
| H | -2.036181 | 3.041103  | 0.000000  |
| H | -3.576868 | 2.896521  | 0.896331  |
| H | -3.576868 | 2.896521  | -0.896331 |
| N | 2.114442  | 0.485412  | 0.000000  |
| N | 4.412663  | 0.779624  | 0.000000  |
| N | 5.929510  | -0.987797 | 0.000000  |
| C | 3.150062  | 1.387085  | 0.000000  |
| C | 4.625219  | -0.582500 | 0.000000  |
| C | 3.562201  | -1.458320 | 0.000000  |
| C | 2.229200  | -0.912717 | 0.000000  |
| C | 3.756771  | -2.949243 | 0.000000  |
| O | 1.193413  | -1.605894 | 0.000000  |
| O | 3.034707  | 2.604619  | 0.000000  |
| H | 1.146092  | 0.867423  | 0.000000  |
| H | 5.185203  | 1.437194  | 0.000000  |
| H | 4.300982  | -3.300458 | -0.891804 |
| H | 2.773028  | -3.430158 | 0.000000  |
| H | 4.300982  | -3.300458 | 0.891804  |
| H | 6.696959  | -0.332813 | 0.000000  |
| H | 6.142825  | -1.973657 | 0.000000  |

*2s: C<sub>s</sub> symmetry*

|   |           |           |           |
|---|-----------|-----------|-----------|
| C | -1.875951 | -1.184818 | 0.000000  |
| C | -3.421763 | 0.759216  | 0.000000  |
| C | -4.258181 | -1.519024 | 0.000000  |
| C | -3.019177 | -2.081700 | 0.000000  |
| C | -2.784385 | -3.563869 | 0.000000  |
| C | -5.851722 | 0.357806  | 0.000000  |
| N | -2.163291 | 0.169868  | 0.000000  |
| N | -4.483969 | -0.165630 | 0.000000  |
| O | -0.692068 | -1.589690 | 0.000000  |
| O | -3.597591 | 1.967176  | 0.000000  |
| H | -1.353278 | 0.839620  | 0.000000  |
| H | -5.159605 | -2.131948 | 0.000000  |
| H | -2.203968 | -3.869865 | 0.880986  |
| H | -2.203968 | -3.869865 | -0.880986 |
| H | -3.733750 | -4.112921 | 0.000000  |
| H | -6.387906 | 0.023560  | -0.896972 |
| H | -5.783186 | 1.448329  | 0.000000  |
| H | -6.387906 | 0.023560  | 0.896972  |
| N | 2.335501  | 2.214911  | 0.000000  |
| N | 1.473767  | 0.078306  | 0.000000  |
| N | 2.785826  | -1.820346 | 0.000000  |
| C | 1.217560  | 1.426654  | 0.000000  |
| C | 2.745112  | -0.456610 | 0.000000  |
| C | 3.867056  | 0.345284  | 0.000000  |
| C | 3.692754  | 1.776736  | 0.000000  |
| C | 5.258035  | -0.225299 | 0.000000  |
| O | 4.584752  | 2.627039  | 0.000000  |
| O | 0.060530  | 1.879200  | 0.000000  |
| H | 2.189664  | 3.220985  | 0.000000  |
| H | 0.632383  | -0.544157 | 0.000000  |
| H | 5.457360  | -0.842267 | 0.891510  |
| H | 5.975341  | 0.602603  | 0.000000  |
| H | 5.457360  | -0.842267 | -0.891510 |
| H | 1.934612  | -2.365856 | 0.000000  |
| H | 3.673760  | -2.297441 | 0.000000  |

*2t: C<sub>s</sub> symmetry*

|   |           |           |           |
|---|-----------|-----------|-----------|
| C | 0.959653  | -1.419772 | 0.000000  |
| C | 2.992987  | 0.017764  | 0.000000  |
| C | 3.158837  | -2.404920 | 0.000000  |
| C | 1.814079  | -2.601214 | 0.000000  |
| C | 1.171072  | -3.956208 | 0.000000  |
| C | 5.213117  | -1.047152 | 0.000000  |
| N | 1.625713  | -0.199344 | 0.000000  |
| N | 3.755191  | -1.164062 | 0.000000  |
| O | -0.281400 | -1.466656 | 0.000000  |
| O | 3.495921  | 1.133399  | 0.000000  |
| H | 1.026336  | 0.654350  | 0.000000  |
| H | 3.855921  | -3.243040 | 0.000000  |
| H | 0.525083  | -4.081227 | -0.879577 |
| H | 0.525083  | -4.081227 | 0.879577  |
| H | 1.925344  | -4.752499 | 0.000000  |
| H | 5.635468  | -1.519178 | 0.896398  |
| H | 5.454464  | 0.018613  | 0.000000  |
| H | 5.635468  | -1.519178 | -0.896398 |
| N | -2.055848 | 0.739494  | 0.000000  |
| N | -2.130180 | 3.052527  | 0.000000  |
| N | -4.110752 | 4.279778  | 0.000000  |
| C | -1.352573 | 1.902615  | 0.000000  |
| C | -3.514089 | 3.048779  | 0.000000  |
| C | -4.209344 | 1.865374  | 0.000000  |
| C | -3.472971 | 0.615608  | 0.000000  |
| C | -5.711990 | 1.825682  | 0.000000  |
| O | -3.977170 | -0.505857 | 0.000000  |
| O | -0.116910 | 1.996250  | 0.000000  |
| H | -1.486102 | -0.132661 | 0.000000  |
| H | -1.598821 | 3.916552  | 0.000000  |
| H | -6.144476 | 2.308013  | 0.891773  |
| H | -6.028721 | 0.777048  | 0.000000  |
| H | -6.144476 | 2.308013  | -0.891773 |
| H | -3.579424 | 5.137346  | 0.000000  |
| H | -5.117275 | 4.341888  | 0.000000  |



*2u: C<sub>s</sub> symmetry*

|   |           |           |           |
|---|-----------|-----------|-----------|
| C | -0.371751 | 1.648427  | 0.000000  |
| C | 2.063036  | 2.148033  | 0.000000  |
| C | 0.406851  | 3.926746  | 0.000000  |
| C | -0.654338 | 3.077907  | 0.000000  |
| C | -2.084119 | 3.531859  | 0.000000  |
| C | 2.801000  | 4.497333  | 0.000000  |
| N | 0.971497  | 1.295870  | 0.000000  |
| N | 1.719004  | 3.513507  | 0.000000  |
| O | -1.259372 | 0.777023  | 0.000000  |
| O | 3.223913  | 1.760878  | 0.000000  |
| H | 1.180625  | 0.266830  | 0.000000  |
| H | 0.270617  | 5.008404  | 0.000000  |
| H | -2.616743 | 3.145206  | 0.879503  |
| H | -2.616743 | 3.145206  | -0.879503 |
| H | -2.151839 | 4.626738  | 0.000000  |
| H | 2.745663  | 5.128149  | -0.896578 |
| H | 3.743276  | 3.943914  | 0.000000  |
| H | 2.745663  | 5.128149  | 0.896578  |
| N | -0.830214 | -1.981465 | 0.000000  |
| N | -1.521790 | -4.194237 | 0.000000  |
| N | -0.047967 | -5.997147 | 0.000000  |
| C | -1.899089 | -2.843946 | 0.000000  |
| C | -0.218889 | -4.642053 | 0.000000  |
| C | 0.829388  | -3.748487 | 0.000000  |
| C | 0.524373  | -2.341083 | 0.000000  |
| C | 2.263073  | -4.201363 | 0.000000  |
| O | 1.392520  | -1.444455 | 0.000000  |
| O | -3.078166 | -2.520010 | 0.000000  |
| H | -1.039479 | -0.956854 | 0.000000  |
| H | -2.304958 | -4.839101 | 0.000000  |
| H | 2.513412  | -4.798811 | 0.891727  |
| H | 2.908943  | -3.317115 | 0.000000  |
| H | 2.513412  | -4.798811 | -0.891727 |
| H | -0.827603 | -6.637559 | 0.000000  |
| H | 0.885170  | -6.380052 | 0.000000  |

*Adenine — 5-methyl-6-aminouracil*

*3a: no symmetry*

|   |           |           |           |
|---|-----------|-----------|-----------|
| N | 0.951400  | -0.352400 | 0.039400  |
| N | 2.992200  | -1.608100 | 0.362400  |
| N | 4.975100  | -0.202500 | 0.083200  |
| N | 3.967500  | 1.772700  | -0.374100 |
| N | 0.894300  | 1.934400  | -0.432900 |
| C | 1.668400  | -1.463000 | 0.308900  |
| C | 3.617400  | -0.446000 | 0.103800  |
| C | 3.018000  | 0.787800  | -0.181800 |
| C | 1.603300  | 0.819300  | -0.196400 |
| C | 5.113200  | 1.141400  | -0.209900 |
| C | 6.021800  | -1.183900 | 0.329300  |
| H | 1.077800  | -2.356600 | 0.520000  |
| H | 6.094000  | 1.599500  | -0.287500 |
| H | -0.126800 | 1.953000  | -0.259900 |
| H | 1.404100  | 2.802500  | -0.533800 |
| H | 6.612200  | -1.360900 | -0.578200 |
| H | 5.535800  | -2.117600 | 0.629000  |
| H | 6.682900  | -0.845400 | 1.136000  |
| N | -3.895200 | 0.788700  | 0.177800  |
| N | -1.889200 | -0.380800 | -0.147300 |
| N | -1.754700 | -2.677000 | -0.465200 |
| C | -2.524300 | 0.829000  | 0.056200  |
| C | -2.562200 | -1.570100 | -0.269100 |
| C | -3.924600 | -1.612000 | -0.153300 |
| C | -4.681200 | -0.416900 | 0.100500  |
| C | -4.583600 | 2.062500  | 0.393500  |
| O | -5.903500 | -0.359400 | 0.228000  |
| O | -1.880900 | 1.889300  | 0.123600  |
| H | -0.834100 | -0.369100 | -0.087800 |
| H | -4.476900 | -2.540500 | -0.261700 |
| H | -0.906600 | -2.508900 | -0.999000 |
| H | -2.246600 | -3.513300 | -0.758200 |
| H | -4.221700 | 2.536500  | 1.313000  |
| H | -5.649300 | 1.834800  | 0.471000  |
| H | -4.394200 | 2.741000  | -0.446200 |

*3a: C<sub>s</sub> symmetry*

|   |           |           |           |
|---|-----------|-----------|-----------|
| N | 0.297493  | -0.964275 | 0.000000  |
| N | 0.842463  | -3.325434 | 0.000000  |
| N | 3.261886  | -3.702372 | 0.000000  |
| N | 3.967006  | -1.551161 | 0.000000  |
| N | 1.920232  | 0.723433  | 0.000000  |
| C | 0.014509  | -2.282413 | 0.000000  |
| C | 2.125564  | -2.920512 | 0.000000  |
| C | 2.586461  | -1.599511 | 0.000000  |
| C | 1.605467  | -0.577816 | 0.000000  |
| C | 4.326252  | -2.819766 | 0.000000  |
| C | 3.295994  | -5.157746 | 0.000000  |
| H | -1.048270 | -2.538949 | 0.000000  |
| H | 5.350966  | -3.177310 | 0.000000  |
| H | 1.193358  | 1.462736  | 0.000000  |
| H | 2.900895  | 0.971563  | 0.000000  |
| H | 3.805502  | -5.533220 | -0.895672 |
| H | 2.260680  | -5.512105 | 0.000000  |
| H | 3.805502  | -5.533220 | 0.895672  |
| N | -2.224001 | 3.433842  | 0.000000  |
| N | -1.723923 | 1.143822  | 0.000000  |
| N | -3.330743 | -0.522511 | 0.000000  |
| C | -1.267090 | 2.448283  | 0.000000  |
| C | -3.058020 | 0.814962  | 0.000000  |
| C | -4.012791 | 1.799477  | 0.000000  |
| C | -3.646175 | 3.184718  | 0.000000  |
| C | -1.754553 | 4.820243  | 0.000000  |
| O | -4.428187 | 4.134637  | 0.000000  |
| O | -0.051126 | 2.702762  | 0.000000  |
| H | -0.991546 | 0.392508  | 0.000000  |
| H | -5.071795 | 1.560675  | 0.000000  |
| H | -2.588721 | -1.205609 | 0.000000  |
| H | -4.285883 | -0.843746 | 0.000000  |
| H | -1.144454 | 5.012967  | 0.889845  |
| H | -2.645817 | 5.452072  | 0.000000  |
| H | -1.144454 | 5.012967  | -0.889845 |

*3b: no symmetry*

|   |           |           |           |
|---|-----------|-----------|-----------|
| N | 3.426637  | -2.320009 | -0.424707 |
| N | 4.668631  | -0.293063 | 0.022967  |
| N | 3.203458  | 1.622792  | 0.388452  |
| N | 1.204719  | 0.628135  | 0.091124  |
| N | 1.109869  | -2.454975 | -0.448351 |
| C | 4.543698  | -1.598335 | -0.263996 |
| C | 3.467454  | 0.290872  | 0.113283  |
| C | 2.213817  | -0.313163 | -0.058983 |
| C | 2.222669  | -1.710243 | -0.310551 |
| C | 1.838860  | 1.757890  | 0.362839  |
| C | 4.203176  | 2.640763  | 0.680729  |
| H | 5.477613  | -2.151637 | -0.373252 |
| H | 1.354642  | 2.709200  | 0.557627  |
| H | 1.251777  | -3.453660 | -0.544635 |
| H | 0.176705  | -2.117337 | -0.171827 |
| H | 5.181666  | 2.221941  | 0.426471  |
| H | 4.192234  | 2.904483  | 1.745752  |
| H | 4.021822  | 3.538219  | 0.078281  |
| N | -3.605344 | -0.778100 | 0.260643  |
| N | -1.630574 | 0.404051  | -0.188381 |
| N | -1.556188 | 2.649903  | -0.779402 |
| C | -2.231555 | -0.793321 | 0.152984  |
| C | -2.336454 | 1.549721  | -0.455932 |
| C | -3.699756 | 1.564348  | -0.356656 |
| C | -4.424602 | 0.384442  | 0.032199  |
| C | -4.260639 | -2.037869 | 0.617895  |
| O | -5.646196 | 0.307106  | 0.153276  |
| O | -1.556921 | -1.815110 | 0.347956  |
| H | -0.583421 | 0.438169  | -0.106564 |
| H | -4.278530 | 2.454544  | -0.583783 |
| H | -0.709437 | 2.432491  | -1.299052 |
| H | -2.074824 | 3.420759  | -1.186143 |
| H | -4.030670 | -2.807272 | -0.128055 |
| H | -5.334182 | -1.837356 | 0.645501  |
| H | -3.907600 | -2.383849 | 1.596054  |

*3b: C<sub>s</sub> symmetry*

|   |           |           |           |
|---|-----------|-----------|-----------|
| N | -4.193533 | -2.970791 | 0.000000  |
| N | -5.562315 | -0.980337 | 0.000000  |
| N | -4.232082 | 1.055751  | 0.000000  |
| N | -2.157954 | 0.164702  | 0.000000  |
| N | -1.883212 | -2.977753 | 0.000000  |
| C | -5.354183 | -2.305939 | 0.000000  |
| C | -4.399392 | -0.317987 | 0.000000  |
| C | -3.103374 | -0.857352 | 0.000000  |
| C | -3.027636 | -2.278021 | 0.000000  |
| C | -2.879326 | 1.274318  | 0.000000  |
| C | -5.305702 | 2.039281  | 0.000000  |
| H | -6.250697 | -2.927831 | 0.000000  |
| H | -2.487067 | 2.286806  | 0.000000  |
| H | -1.971201 | -3.986643 | 0.000000  |
| H | -0.942885 | -2.558135 | 0.000000  |
| H | -6.250274 | 1.486601  | 0.000000  |
| H | -5.254974 | 2.668811  | -0.896631 |
| H | -5.254974 | 2.668811  | 0.896631  |
| N | 2.830768  | -1.133174 | 0.000000  |
| N | 0.813558  | 0.062086  | 0.000000  |
| N | 0.692831  | 2.374893  | 0.000000  |
| C | 1.456241  | -1.163535 | 0.000000  |
| C | 1.484691  | 1.261920  | 0.000000  |
| C | 2.854865  | 1.288977  | 0.000000  |
| C | 3.618955  | 0.075857  | 0.000000  |
| C | 3.525739  | -2.421812 | 0.000000  |
| O | 4.847121  | 0.002547  | 0.000000  |
| O | 0.813017  | -2.223274 | 0.000000  |
| H | -0.228460 | 0.038917  | 0.000000  |
| H | 3.402241  | 2.226565  | 0.000000  |
| H | 1.108764  | 3.292770  | 0.000000  |
| H | -0.311201 | 2.291919  | 0.000000  |
| H | 3.251343  | -2.999551 | 0.890004  |
| H | 4.595597  | -2.200447 | 0.000000  |
| H | 3.251343  | -2.999551 | -0.890004 |

*Thymine — 5-methyl-6-aminouracil*

*3c: C<sub>s</sub> symmetry*

|   |           |           |           |
|---|-----------|-----------|-----------|
| N | 0.034573  | 0.024476  | 0.000000  |
| N | -1.341640 | 1.905912  | 0.000000  |
| C | -0.052075 | 1.389789  | 0.000000  |
| C | -2.446845 | 1.070157  | 0.000000  |
| C | -2.367639 | -0.281907 | 0.000000  |
| C | -1.036271 | -0.897811 | 0.000000  |
| C | -3.563620 | -1.185675 | 0.000000  |
| C | -1.535563 | 3.356235  | 0.000000  |
| O | -0.824923 | -2.104330 | 0.000000  |
| O | 0.946607  | 2.137879  | 0.000000  |
| H | 1.004699  | -0.375431 | 0.000000  |
| H | -3.403380 | 1.591930  | 0.000000  |
| H | -4.498887 | -0.612934 | 0.000000  |
| H | -3.549642 | -1.844115 | 0.879150  |
| H | -3.549642 | -1.844115 | -0.879150 |
| H | -0.550927 | 3.827016  | 0.000000  |
| H | -2.088646 | 3.665491  | 0.896155  |
| H | -2.088646 | 3.665491  | -0.896155 |
| N | 4.957799  | -0.693474 | 0.000000  |
| N | 3.539039  | 1.166283  | 0.000000  |
| N | 4.263136  | 3.360594  | 0.000000  |
| C | 3.673895  | -0.207477 | 0.000000  |
| C | 4.599967  | 2.037671  | 0.000000  |
| C | 5.882804  | 1.551906  | 0.000000  |
| C | 6.138737  | 0.140363  | 0.000000  |
| C | 5.123063  | -2.148310 | 0.000000  |
| O | 7.251630  | -0.385233 | 0.000000  |
| O | 2.672696  | -0.944047 | 0.000000  |
| H | 2.558481  | 1.515213  | 0.000000  |
| H | 6.741497  | 2.216176  | 0.000000  |
| H | 3.295494  | 3.650238  | 0.000000  |
| H | 4.983195  | 4.065612  | 0.000000  |
| H | 4.651929  | -2.581978 | 0.889430  |
| H | 6.198316  | -2.341505 | 0.000000  |
| H | 4.651929  | -2.581978 | -0.889430 |

*3d: C<sub>s</sub> symmetry*

|   |           |           |           |
|---|-----------|-----------|-----------|
| N | -0.609094 | -1.430770 | 0.000000  |
| N | -0.871787 | -3.758476 | 0.000000  |
| C | -1.498043 | -2.496241 | 0.000000  |
| C | 0.494046  | -3.879714 | 0.000000  |
| C | 1.355769  | -2.824821 | 0.000000  |
| C | 0.775028  | -1.491645 | 0.000000  |
| C | 2.853974  | -2.985039 | 0.000000  |
| C | -1.723726 | -4.949638 | 0.000000  |
| O | 1.454595  | -0.440508 | 0.000000  |
| O | -2.711675 | -2.360795 | 0.000000  |
| H | -1.053203 | -0.476094 | 0.000000  |
| H | 0.856893  | -4.908066 | 0.000000  |
| H | 3.206069  | -3.527945 | -0.887710 |
| H | 3.206069  | -3.527945 | 0.887710  |
| H | 3.320726  | -1.995087 | 0.000000  |
| H | -2.761265 | -4.607149 | 0.000000  |
| H | -1.536171 | -5.553285 | 0.896908  |
| H | -1.536171 | -5.553285 | -0.896908 |
| N | -1.573623 | 3.408112  | 0.000000  |
| N | 0.346471  | 2.072613  | 0.000000  |
| N | 2.505081  | 2.888670  | 0.000000  |
| C | -1.029240 | 2.148851  | 0.000000  |
| C | 1.170149  | 3.170506  | 0.000000  |
| C | 0.628704  | 4.431629  | 0.000000  |
| C | -0.792345 | 4.624925  | 0.000000  |
| C | -3.034242 | 3.509154  | 0.000000  |
| O | -1.368431 | 5.712472  | 0.000000  |
| O | -1.722564 | 1.115521  | 0.000000  |
| H | 0.742833  | 1.104929  | 0.000000  |
| H | 1.254421  | 5.318738  | 0.000000  |
| H | 2.832553  | 1.932605  | 0.000000  |
| H | 3.180368  | 3.636494  | 0.000000  |
| H | -3.447576 | 3.019707  | -0.889214 |
| H | -3.274249 | 4.574992  | 0.000000  |
| H | -3.447576 | 3.019707  | 0.889214  |

*Guanine — 5-methyl-6-aminouracil*

*3e: C<sub>s</sub> symmetry*

|   |           |           |           |
|---|-----------|-----------|-----------|
| N | -1.749485 | 0.068170  | 0.000000  |
| N | -4.127099 | 0.059085  | 0.000000  |
| N | -4.986708 | -2.208736 | 0.000000  |
| N | -3.057631 | -3.389278 | 0.000000  |
| N | -2.937618 | 2.054757  | 0.000000  |
| C | -2.967481 | 0.695579  | 0.000000  |
| C | -3.971691 | -1.282468 | 0.000000  |
| C | -2.783348 | -2.034121 | 0.000000  |
| C | -1.547781 | -1.323550 | 0.000000  |
| C | -4.368543 | -3.452754 | 0.000000  |
| C | -6.411327 | -1.913192 | 0.000000  |
| O | -0.379553 | -1.772841 | 0.000000  |
| H | -0.890675 | 0.672792  | 0.000000  |
| H | -4.953296 | -4.366967 | 0.000000  |
| H | -3.814849 | 2.553527  | 0.000000  |
| H | -2.060948 | 2.558908  | 0.000000  |
| H | -6.525458 | -0.825044 | 0.000000  |
| H | -6.892577 | -2.325673 | 0.895610  |
| H | -6.892577 | -2.325673 | -0.895610 |
| N | 2.685624  | 2.052037  | 0.000000  |
| N | 1.721227  | -0.073266 | 0.000000  |
| N | 2.902734  | -2.047253 | 0.000000  |
| C | 1.550766  | 1.287744  | 0.000000  |
| C | 2.950703  | -0.687301 | 0.000000  |
| C | 4.095766  | 0.072158  | 0.000000  |
| C | 4.029988  | 1.501853  | 0.000000  |
| C | 2.527152  | 3.506244  | 0.000000  |
| O | 4.989724  | 2.271251  | 0.000000  |
| O | 0.402013  | 1.788452  | 0.000000  |
| H | 0.853387  | -0.674846 | 0.000000  |
| H | 5.080824  | -0.384054 | 0.000000  |
| H | 2.013588  | -2.532671 | 0.000000  |
| H | 3.755047  | -2.585024 | 0.000000  |
| H | 1.976077  | 3.828426  | -0.891198 |
| H | 3.534885  | 3.928932  | 0.000000  |
| H | 1.976077  | 3.828426  | 0.891198  |

*3f: no symmetry*

|   |           |           |           |
|---|-----------|-----------|-----------|
| N | -2.641068 | 1.911306  | -0.389812 |
| N | -4.438756 | 0.527996  | 0.298093  |
| N | -3.745146 | -1.797965 | 0.439440  |
| N | -1.574985 | -1.616175 | -0.144237 |
| N | -4.770370 | 2.808904  | 0.000599  |
| C | -3.945718 | 1.711068  | -0.007674 |
| C | -3.523202 | -0.463976 | 0.189904  |
| C | -2.174323 | -0.373666 | -0.169219 |
| C | -1.631607 | 0.907076  | -0.501346 |
| C | -2.537782 | -2.436038 | 0.221637  |
| C | -5.009322 | -2.396771 | 0.842957  |
| O | -0.497560 | 1.229887  | -0.851977 |
| H | -2.319689 | 2.840830  | -0.653159 |
| H | -2.438190 | -3.507722 | 0.353663  |
| H | -5.666271 | 2.644185  | 0.446949  |
| H | -4.362285 | 3.718337  | 0.183802  |
| H | -5.760157 | -2.271122 | 0.053935  |
| H | -5.374969 | -1.920869 | 1.759897  |
| H | -4.850936 | -3.463732 | 1.026602  |
| N | 4.360513  | 0.636474  | 0.331674  |
| N | 2.132291  | 0.163212  | -0.241206 |
| N | 1.390106  | -1.941971 | -0.913322 |
| C | 3.069327  | 1.112601  | 0.164478  |
| C | 2.427628  | -1.159055 | -0.469987 |
| C | 3.713743  | -1.608013 | -0.294395 |
| C | 4.767101  | -0.723185 | 0.110198  |
| C | 5.363468  | 1.610942  | 0.757669  |
| O | 5.945832  | -1.047804 | 0.283108  |
| O | 2.752568  | 2.284558  | 0.355076  |
| H | 1.194604  | 0.532835  | -0.446304 |
| H | 3.970730  | -2.650502 | -0.456408 |
| H | 0.428507  | -1.719821 | -0.631511 |
| H | 1.589035  | -2.934453 | -0.928978 |
| H | 5.444015  | 2.419723  | 0.021473  |
| H | 6.310313  | 1.072373  | 0.843483  |
| H | 5.078993  | 2.050790  | 1.721053  |

*3f: C<sub>s</sub> symmetry*

|   |           |           |           |
|---|-----------|-----------|-----------|
| N | 2.364812  | 2.602848  | 0.000000  |
| N | 4.080185  | 0.964721  | 0.000000  |
| N | 3.145870  | -1.278610 | 0.000000  |
| N | 0.941407  | -0.805568 | 0.000000  |
| N | 4.622585  | 3.211910  | 0.000000  |
| C | 3.686726  | 2.224150  | 0.000000  |
| C | 3.045741  | 0.093196  | 0.000000  |
| C | 1.673596  | 0.364119  | 0.000000  |
| C | 1.237734  | 1.723895  | 0.000000  |
| C | 1.848166  | -1.760018 | 0.000000  |
| C | 4.386520  | -2.042272 | 0.000000  |
| O | 0.105287  | 2.203159  | 0.000000  |
| H | 2.107126  | 3.587700  | 0.000000  |
| H | 1.640929  | -2.824390 | 0.000000  |
| H | 5.594911  | 2.938407  | 0.000000  |
| H | 4.384383  | 4.191805  | 0.000000  |
| H | 4.452107  | -2.670594 | 0.896156  |
| H | 5.214923  | -1.328008 | 0.000000  |
| H | 4.452107  | -2.670594 | -0.896156 |
| N | -4.916961 | 2.180377  | 0.000000  |
| N | -2.694936 | 1.417681  | 0.000000  |
| N | -2.118340 | -0.839987 | 0.000000  |
| C | -3.570805 | 2.503602  | 0.000000  |
| C | -3.099792 | 0.104200  | 0.000000  |
| C | -4.444116 | -0.190612 | 0.000000  |
| C | -5.436871 | 0.840511  | 0.000000  |
| C | -5.855578 | 3.300906  | 0.000000  |
| O | -6.658514 | 0.659031  | 0.000000  |
| O | -3.154357 | 3.659468  | 0.000000  |
| H | -1.697866 | 1.666130  | 0.000000  |
| H | -4.791046 | -1.219459 | 0.000000  |
| H | -1.115256 | -0.643700 | 0.000000  |
| H | -2.398687 | -1.808718 | 0.000000  |
| H | -5.701554 | 3.925182  | 0.888350  |
| H | -6.860031 | 2.870658  | 0.000000  |
| H | -5.701554 | 3.925182  | -0.888350 |

*3g: no symmetry*

|   |           |           |           |
|---|-----------|-----------|-----------|
| N | -3.246528 | 2.426815  | -0.062559 |
| N | -4.382291 | 0.367221  | -0.380977 |
| N | -2.806485 | -1.491474 | -0.464069 |
| N | -0.875950 | -0.390891 | -0.141539 |
| N | -5.576198 | 2.362258  | -0.318445 |
| C | -4.386646 | 1.675838  | -0.239063 |
| C | -3.134897 | -0.160807 | -0.338566 |
| C | -1.921182 | 0.503198  | -0.140650 |
| C | -1.912511 | 1.922787  | 0.007410  |
| C | -1.432047 | -1.567358 | -0.336019 |
| C | -3.736964 | -2.589283 | -0.688574 |
| O | -0.969023 | 2.701094  | 0.166366  |
| H | -3.307365 | 3.441938  | -0.022288 |
| H | -0.882366 | -2.501432 | -0.391352 |
| H | -6.391606 | 1.759024  | -0.286790 |
| H | -5.667885 | 3.221191  | 0.212444  |
| H | -4.281579 | -2.438117 | -1.627753 |
| H | -4.457684 | -2.649367 | 0.135139  |
| H | -3.169498 | -3.522768 | -0.743899 |
| N | 3.900022  | -1.549298 | 0.144901  |
| N | 1.951575  | -0.250751 | 0.207418  |
| N | 1.928704  | 2.038497  | 0.601125  |
| C | 2.522639  | -1.504571 | 0.052302  |
| C | 2.664258  | 0.901097  | 0.432420  |
| C | 4.036662  | 0.842926  | 0.510289  |
| C | 4.738330  | -0.397414 | 0.372522  |
| C | 4.533117  | -2.857313 | -0.009257 |
| O | 5.963044  | -0.540177 | 0.433667  |
| O | 1.821187  | -2.501643 | -0.154678 |
| H | 0.916334  | -0.234756 | 0.108179  |
| H | 4.628301  | 1.734892  | 0.692795  |
| H | 0.934188  | 2.088497  | 0.369288  |
| H | 2.428038  | 2.916160  | 0.610141  |
| H | 4.167093  | -3.549555 | 0.758488  |
| H | 5.609313  | -2.699255 | 0.096404  |
| H | 4.300535  | -3.279425 | -0.994410 |

*3g: C<sub>s</sub> symmetry*

|   |           |           |           |
|---|-----------|-----------|-----------|
| N | -3.701876 | 2.445859  | 0.000000  |
| N | -4.872078 | 0.379991  | 0.000000  |
| N | -3.321902 | -1.498863 | 0.000000  |
| N | -1.363469 | -0.399853 | 0.000000  |
| N | -6.040173 | 2.375354  | 0.000000  |
| C | -4.858536 | 1.698028  | 0.000000  |
| C | -3.630189 | -0.157753 | 0.000000  |
| C | -2.399507 | 0.505298  | 0.000000  |
| C | -2.370653 | 1.929612  | 0.000000  |
| C | -1.940021 | -1.582095 | 0.000000  |
| C | -4.282151 | -2.595303 | 0.000000  |
| O | -1.414173 | 2.709264  | 0.000000  |
| H | -3.745492 | 3.462406  | 0.000000  |
| H | -1.400131 | -2.523236 | 0.000000  |
| H | -6.892243 | 1.832955  | 0.000000  |
| H | -6.094586 | 3.382078  | 0.000000  |
| H | -4.156277 | -3.214672 | -0.895771 |
| H | -5.285248 | -2.159235 | 0.000000  |
| H | -4.156277 | -3.214672 | 0.895771  |
| N | 3.419347  | -1.536756 | 0.000000  |
| N | 1.485454  | -0.214846 | 0.000000  |
| N | 1.502019  | 2.104977  | 0.000000  |
| C | 2.039550  | -1.485520 | 0.000000  |
| C | 2.216913  | 0.947419  | 0.000000  |
| C | 3.592197  | 0.880484  | 0.000000  |
| C | 4.275930  | -0.376275 | 0.000000  |
| C | 4.034652  | -2.862086 | 0.000000  |
| O | 5.501092  | -0.527850 | 0.000000  |
| O | 1.320383  | -2.490934 | 0.000000  |
| H | 0.445390  | -0.204000 | 0.000000  |
| H | 4.199637  | 1.780445  | 0.000000  |
| H | 0.480823  | 2.143450  | 0.000000  |
| H | 2.003410  | 2.979874  | 0.000000  |
| H | 3.726336  | -3.425025 | 0.889256  |
| H | 5.116275  | -2.705666 | 0.000000  |
| H | 3.726336  | -3.425025 | -0.889256 |

*Cytosine — 5-methyl-6-aminouracil*

*3h: no symmetry*

|   |           |           |           |
|---|-----------|-----------|-----------|
| N | -2.313659 | 0.392286  | 0.091450  |
| N | -3.304648 | -1.779220 | -0.101872 |
| N | -3.621427 | 2.281507  | 0.045317  |
| C | -2.144250 | -0.962242 | 0.053405  |
| C | -4.534639 | -1.220722 | -0.207557 |
| C | -4.707974 | 0.132537  | -0.163531 |
| C | -3.529295 | 0.924008  | -0.000074 |
| C | -3.100038 | -3.228782 | -0.142806 |
| O | -1.051322 | -1.528146 | 0.148202  |
| H | -5.367948 | -1.910259 | -0.326241 |
| H | -5.697965 | 0.571747  | -0.249692 |
| H | -2.798244 | 2.801393  | 0.322668  |
| H | -4.520813 | 2.727511  | 0.156241  |
| H | -2.635590 | -3.566853 | 0.790235  |
| H | -2.426723 | -3.486152 | -0.967826 |
| H | -4.069699 | -3.717677 | -0.280191 |
| N | 3.956995  | -0.801997 | -0.023154 |
| N | 1.637100  | -0.519271 | 0.199465  |
| N | 0.586874  | 1.559009  | 0.221779  |
| C | 2.715062  | -1.399317 | 0.131028  |
| C | 1.753195  | 0.844348  | 0.099199  |
| C | 2.990892  | 1.415109  | -0.067781 |
| C | 4.177429  | 0.612699  | -0.138107 |
| C | 5.106734  | -1.702103 | -0.092439 |
| O | 5.324245  | 1.046302  | -0.284545 |
| O | 2.555029  | -2.615431 | 0.202819  |
| H | 0.703614  | -0.952045 | 0.250676  |
| H | 3.109593  | 2.492485  | -0.132726 |
| H | -0.316861 | 1.089307  | 0.115153  |
| H | 0.624538  | 2.511227  | -0.116428 |
| H | 5.164543  | -2.311542 | 0.817045  |
| H | 5.994508  | -1.073487 | -0.195155 |
| H | 5.010318  | -2.376685 | -0.951869 |

*3h: C<sub>s</sub> symmetry*

|   |           |           |           |
|---|-----------|-----------|-----------|
| N | -1.987583 | -0.829658 | 0.000000  |
| N | -3.170974 | 1.252911  | 0.000000  |
| N | -3.130171 | -2.821385 | 0.000000  |
| C | -1.932959 | 0.536430  | 0.000000  |
| C | -4.352690 | 0.586767  | 0.000000  |
| C | -4.409010 | -0.775369 | 0.000000  |
| C | -3.155886 | -1.464614 | 0.000000  |
| C | -3.144736 | 2.720517  | 0.000000  |
| O | -0.877570 | 1.175747  | 0.000000  |
| H | -5.249444 | 1.204146  | 0.000000  |
| H | -5.362442 | -1.296573 | 0.000000  |
| H | -2.238513 | -3.297851 | 0.000000  |
| H | -3.979133 | -3.366132 | 0.000000  |
| H | -3.643778 | 3.106879  | -0.897305 |
| H | -2.097146 | 3.029061  | 0.000000  |
| H | -3.643778 | 3.106879  | 0.897305  |
| N | 4.191333  | 0.861534  | 0.000000  |
| N | 1.888272  | 0.411574  | 0.000000  |
| N | 0.995953  | -1.730386 | 0.000000  |
| C | 2.901100  | 1.367619  | 0.000000  |
| C | 2.109941  | -0.943074 | 0.000000  |
| C | 3.397853  | -1.424244 | 0.000000  |
| C | 4.523135  | -0.537233 | 0.000000  |
| C | 5.274913  | 1.842619  | 0.000000  |
| O | 5.707857  | -0.886330 | 0.000000  |
| O | 2.645917  | 2.569911  | 0.000000  |
| H | 0.924138  | 0.771916  | 0.000000  |
| H | 3.600176  | -2.491084 | 0.000000  |
| H | 0.045317  | -1.355173 | 0.000000  |
| H | 1.122729  | -2.730378 | 0.000000  |
| H | 5.207768  | 2.481926  | -0.888451 |
| H | 6.211049  | 1.279074  | 0.000000  |
| H | 5.207768  | 2.481926  | 0.888451  |



*3i: C<sub>s</sub> symmetry*

|   |           |           |           |
|---|-----------|-----------|-----------|
| N | -0.302763 | -1.404587 | 0.000000  |
| N | -1.937126 | -3.141915 | 0.000000  |
| N | 1.940494  | -1.886184 | 0.000000  |
| C | -1.615458 | -1.753059 | 0.000000  |
| C | -0.945062 | -4.074914 | 0.000000  |
| C | 0.369929  | -3.727210 | 0.000000  |
| C | 0.673902  | -2.323906 | 0.000000  |
| C | -3.342421 | -3.555568 | 0.000000  |
| O | -2.540151 | -0.924059 | 0.000000  |
| H | -1.270802 | -5.113775 | 0.000000  |
| H | 1.148183  | -4.485802 | 0.000000  |
| H | 2.149635  | -0.860029 | 0.000000  |
| H | 2.699770  | -2.552372 | 0.000000  |
| H | -3.949359 | -2.647672 | 0.000000  |
| H | -3.565547 | -4.147698 | 0.896727  |
| H | -3.565547 | -4.147698 | -0.896727 |
| N | 1.968248  | 3.043812  | 0.000000  |
| N | 0.292448  | 1.413634  | 0.000000  |
| N | -1.970168 | 1.877568  | 0.000000  |
| C | 1.634452  | 1.714845  | 0.000000  |
| C | -0.706363 | 2.364068  | 0.000000  |
| C | -0.366375 | 3.699245  | 0.000000  |
| C | 0.997740  | 4.121220  | 0.000000  |
| C | 3.390645  | 3.382995  | 0.000000  |
| O | 1.398745  | 5.286557  | 0.000000  |
| O | 2.497834  | 0.812185  | 0.000000  |
| H | 0.053032  | 0.395357  | 0.000000  |
| H | -1.129262 | 4.471725  | 0.000000  |
| H | -2.169787 | 0.866062  | 0.000000  |
| H | -2.739368 | 2.529996  | 0.000000  |
| H | 3.880196  | 2.970506  | 0.890001  |
| H | 3.449700  | 4.474229  | 0.000000  |
| H | 3.880196  | 2.970506  | -0.890001 |

*3j: C<sub>s</sub> symmetry*

|   |           |           |           |
|---|-----------|-----------|-----------|
| N | 1.350562  | 0.000000  | 0.000000  |
| N | -0.649332 | 1.276424  | 0.000000  |
| N | 3.424637  | 0.966545  | 0.000000  |
| C | 0.000000  | 0.000000  | 0.000000  |
| C | 0.094433  | 2.418212  | 0.000000  |
| C | 1.457635  | 2.402679  | 0.000000  |
| C | 2.082583  | 1.109149  | 0.000000  |
| C | -2.111172 | 1.342258  | 0.000000  |
| O | -0.686515 | -1.035659 | 0.000000  |
| H | -0.470404 | 3.349229  | 0.000000  |
| H | 2.024283  | 3.330494  | 0.000000  |
| H | 3.870133  | 0.030615  | 0.000000  |
| H | 4.019742  | 1.782195  | 0.000000  |
| H | -2.479174 | 0.313296  | 0.000000  |
| H | -2.472315 | 1.862589  | -0.896600 |
| H | -2.472315 | 1.862589  | 0.896600  |
| N | 4.783331  | -3.967498 | 0.000000  |
| N | 2.684190  | -5.034229 | 0.000000  |
| N | 0.658299  | -3.827933 | 0.000000  |
| C | 4.077523  | -5.160191 | 0.000000  |
| C | 2.015743  | -3.828147 | 0.000000  |
| C | 2.751598  | -2.673663 | 0.000000  |
| C | 4.164717  | -2.678543 | 0.000000  |
| C | 6.242745  | -4.070965 | 0.000000  |
| O | 4.874067  | -1.648314 | 0.000000  |
| O | 4.605663  | -6.268225 | 0.000000  |
| H | 2.196260  | -5.923753 | 0.000000  |
| H | 2.236388  | -1.716132 | 0.000000  |
| H | 0.120883  | -4.681466 | 0.000000  |
| H | 0.167811  | -2.926056 | 0.000000  |
| H | 6.583700  | -4.614046 | 0.889154  |
| H | 6.632327  | -3.050360 | 0.000000  |
| H | 6.583700  | -4.614046 | -0.889154 |
